# Supplementary material
Source: publisher figshare collection journal article supplement (https://acs.figshare.com/ndownloader/files/14949443)
Supplement: Supplementary file 1 [file 14949443]

## *Supporting Information*

### **$\alpha$ -Alkylation of Nitriles with Alcohols Catalyzed by NNN' Pincer Ru(II) Complexes Bearing Bipyridyl Imidazoline Ligands**

*Zhi-Hui Zhu, Yigao Li, Yan-Bing Wang, Zhi-Gang Lan, Xinju Zhu,\* Xin-Qi Hao,\* and Mao-Ping Song*

College of Chemistry and Molecular Engineering, Zhengzhou University, No. 100 of Science Road, Zhengzhou, Henan 450001, P. R. China

E-mail: zhuxinju@zzu.edu.cn, xqhao@zzu.edu.cn

#### **Table of contents**

|                                                                                                                        |                |
|------------------------------------------------------------------------------------------------------------------------|----------------|
| <b>X-ray data of 1f, 1g and 2a.....</b>                                                                                | <b>S1</b>      |
| <b>Table S1. Crystal data and structure refinement of 1f, 1g and 2a.....</b>                                           | <b>S1</b>      |
| <b>Figure S1. ORTEP views of the molecular structures of 1f with ellipsoids drawn at the 30% probability level....</b> | <b>S2</b>      |
| <b>Figure S2. ORTEP views of the molecular structures of 1g with ellipsoids drawn at the 30% probability level....</b> | <b>S2</b>      |
| <b>Figure S3. ORTEP views of the molecular structures of 2a with ellipsoids drawn at the 30% probability level....</b> | <b>S3</b>      |
| <b>Characterization of vinyl nitrile: 2,3-diphenylbut-2-enenitrile.....</b>                                            | <b>S4</b>      |
| <b>Figure S4. <sup>1</sup>H NMR spectrum of 2,3-diphenylbut-2-enenitrile.....</b>                                      | <b>S4</b>      |
| <b>Figure S5. Mass spectroscopy of 2,3-diphenylbut-2-enenitrile.....</b>                                               | <b>S5</b>      |
| <b>NMR spectra of products (Figure S6-S97).....</b>                                                                    | <b>S6-S51</b>  |
| <b>IR of compound 2a-h (Figure S98-S105).....</b>                                                                      | <b>S52-S54</b> |

## X-ray data of 1f, 1g and 2a

**Table S1.** Crystal data and structure refinement of **1f**, **1g** and **2a**.

| Structure                              | <b>1f</b>                                                        | <b>1g</b>                                                        | <b>2a</b>                                                          |
|----------------------------------------|------------------------------------------------------------------|------------------------------------------------------------------|--------------------------------------------------------------------|
| Identification code                    | 20190101                                                         | 20190102                                                         | 201712284                                                          |
| Empirical formula                      | C <sub>32</sub> H <sub>26</sub> N <sub>4</sub> O <sub>2</sub> S  | C <sub>32</sub> H <sub>26</sub> N <sub>4</sub> O <sub>3</sub> S  | C <sub>42</sub> H <sub>41</sub> C <sub>12</sub> N <sub>4</sub> PRu |
| Formula weight                         | 530.63                                                           | 546.63                                                           | 804.75                                                             |
| Temperature/K                          | 293(2)                                                           | 293(2)                                                           | 293                                                                |
| Crystal system                         | orthorhombic                                                     | orthorhombic                                                     | orthorhombic                                                       |
| Space group                            | P2 <sub>1</sub> 2 <sub>1</sub> 2 <sub>1</sub>                    | P2 <sub>1</sub> 2 <sub>1</sub> 2 <sub>1</sub>                    | P2 <sub>1</sub> 2 <sub>1</sub> 2 <sub>1</sub>                      |
| a/Å                                    | 10.0718(4)                                                       | 10.0032(2)                                                       | 10.9706(2)                                                         |
| b/Å                                    | 13.9361(4)                                                       | 14.1704(3)                                                       | 16.6015(4)                                                         |
| c/Å                                    | 19.3932(7)                                                       | 19.5208(4)                                                       | 20.7484(4)                                                         |
| $\alpha$ /°                            | 90                                                               | 90                                                               | 90                                                                 |
| $\beta$ /°                             | 90                                                               | 90                                                               | 90                                                                 |
| $\gamma$ /°                            | 90                                                               | 90                                                               | 90                                                                 |
| Volume/Å <sup>3</sup>                  | 2722.05(17)                                                      | 2767.08(10)                                                      | 3778.88(15)                                                        |
| Z                                      | 4                                                                | 4                                                                | 4                                                                  |
| $\rho_{\text{calc}}/\text{cm}^3$       | 1.295                                                            | 1.312                                                            | 1.414                                                              |
| $\mu/\text{mm}^{-1}$                   | 1.347                                                            | 1.369                                                            | 5.330                                                              |
| F(000)                                 | 1112.0                                                           | 1144.0                                                           | 1656.0                                                             |
| Crystal size/mm <sup>3</sup>           | 0.18 × 0.15 × 0.12                                               | 0.16 × 0.15 × 0.13                                               | 0.2749 × 0.1933 × 0.1769                                           |
| Radiation                              | CuK $\alpha$ ( $\lambda$ = 1.54184)                              | CuK $\alpha$ ( $\lambda$ = 1.54184)                              | CuK $\alpha$ ( $\lambda$ = 1.54184)                                |
| 2 $\theta$ range for data collection/° | 7.812 to 134.154                                                 | 7.71 to 141.724                                                  | 6.82 to 134.148                                                    |
| Index ranges                           | -11 ≤ h ≤ 12,<br>-16 ≤ k ≤ 16,<br>-22 ≤ l ≤ 23                   | -7 ≤ h ≤ 12,<br>-17 ≤ k ≤ 12,<br>-23 ≤ l ≤ 23                    | -8 ≤ h ≤ 13,<br>-17 ≤ k ≤ 19,<br>-24 ≤ l ≤ 15                      |
| Reflections collected                  | 11232                                                            | 10821                                                            | 10200                                                              |
| Independent reflections                | 4858 [R <sub>int</sub> = 0.0299,<br>R <sub>sigma</sub> = 0.0389] | 5222 [R <sub>int</sub> = 0.0301,<br>R <sub>sigma</sub> = 0.0380] | 5980 [R <sub>int</sub> = 0.0362,<br>R <sub>sigma</sub> = 0.0564]   |

|                                                |                                  |                                  |                                  |
|------------------------------------------------|----------------------------------|----------------------------------|----------------------------------|
| Data/restraints/parameters                     | 4858/0/353                       | 5222/2/388                       | 5980/0/455                       |
| Goodness-of-fit on $F^2$                       | 1.021                            | 1.034                            | 1.036                            |
| Final R indexes [ $I \geq 2\sigma$ (I)]        | $R_1 = 0.0409$ , $wR_2 = 0.1032$ | $R_1 = 0.0452$ , $wR_2 = 0.1139$ | $R_1 = 0.0508$ , $wR_2 = 0.1270$ |
| Final R indexes [all data]                     | $R_1 = 0.0471$ , $wR_2 = 0.1088$ | $R_1 = 0.0530$ , $wR_2 = 0.1228$ | $R_1 = 0.0562$ , $wR_2 = 0.1326$ |
| Largest diff. peak/hole / $e \text{ \AA}^{-3}$ | 0.12/-0.20                       | 0.12/-0.21                       | 0.98/-0.95                       |

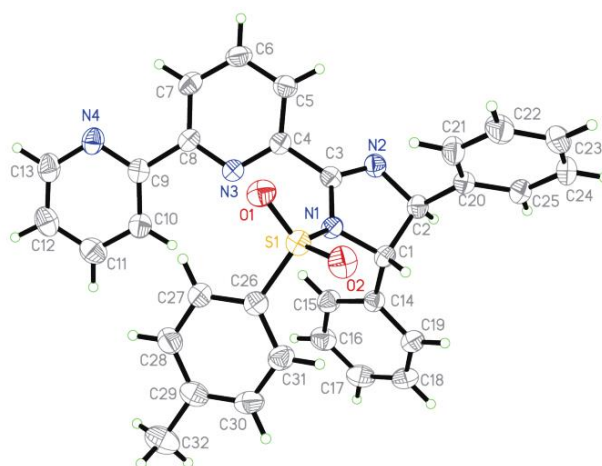

**Figure S1.** ORTEP views of the molecular structures of **1f** with ellipsoids drawn at the 30% probability level.

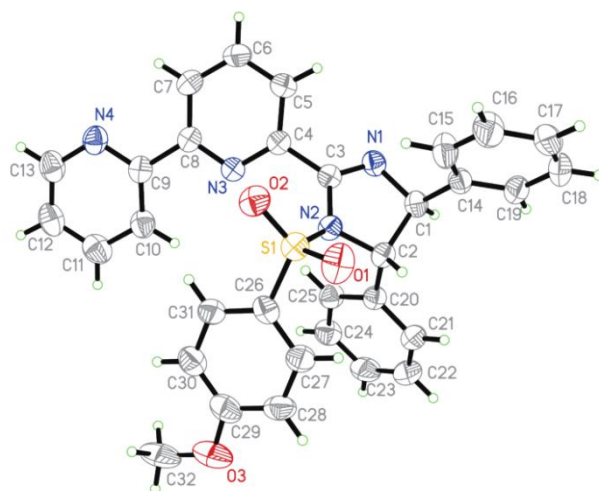

**Figure S2.** ORTEP views of the molecular structures of **1g** with ellipsoids drawn at the 30% probability level.

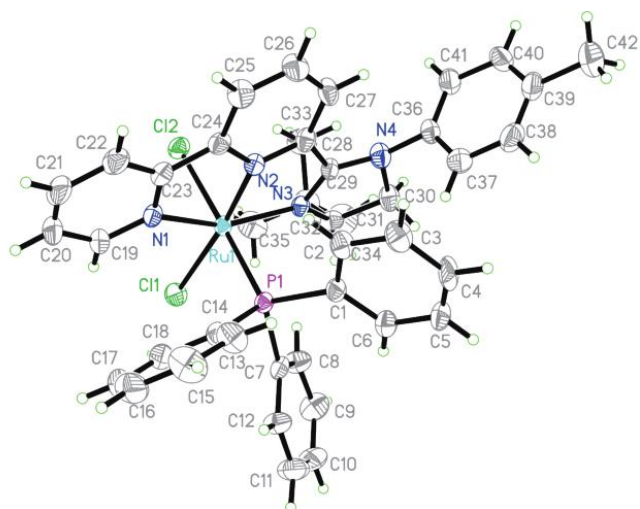

**Figure S3.** ORTEP views of the molecular structures of **2a** with ellipsoids drawn at the 30% probability level.

## Characterization of vinyl nitrile: 2,3-diphenylbut-2-enitrile

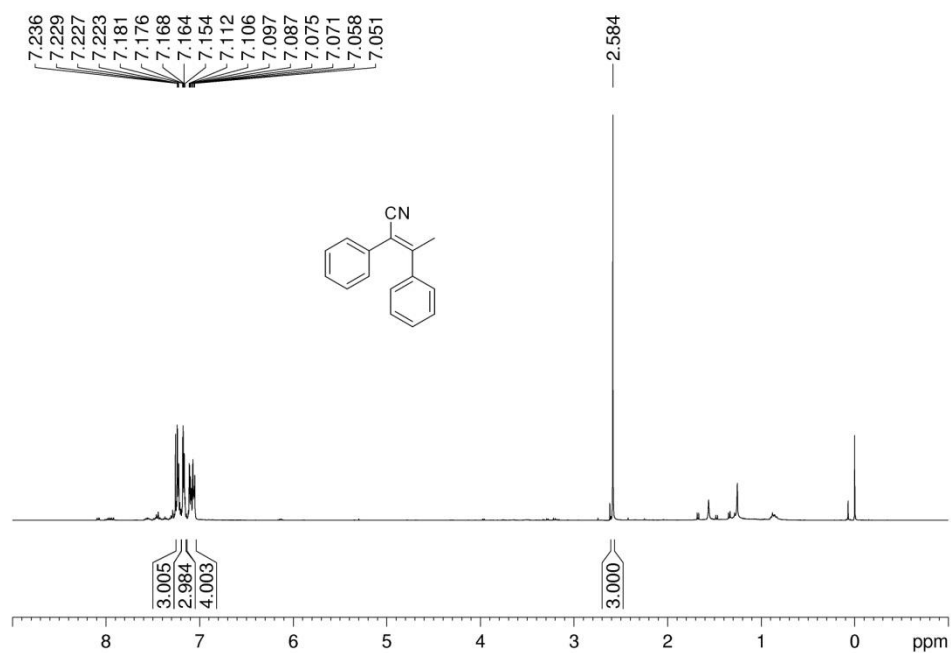

**Figure S4.**  $^1\text{H}$  NMR spectrum of 2,3-diphenylbut-2-enitrile

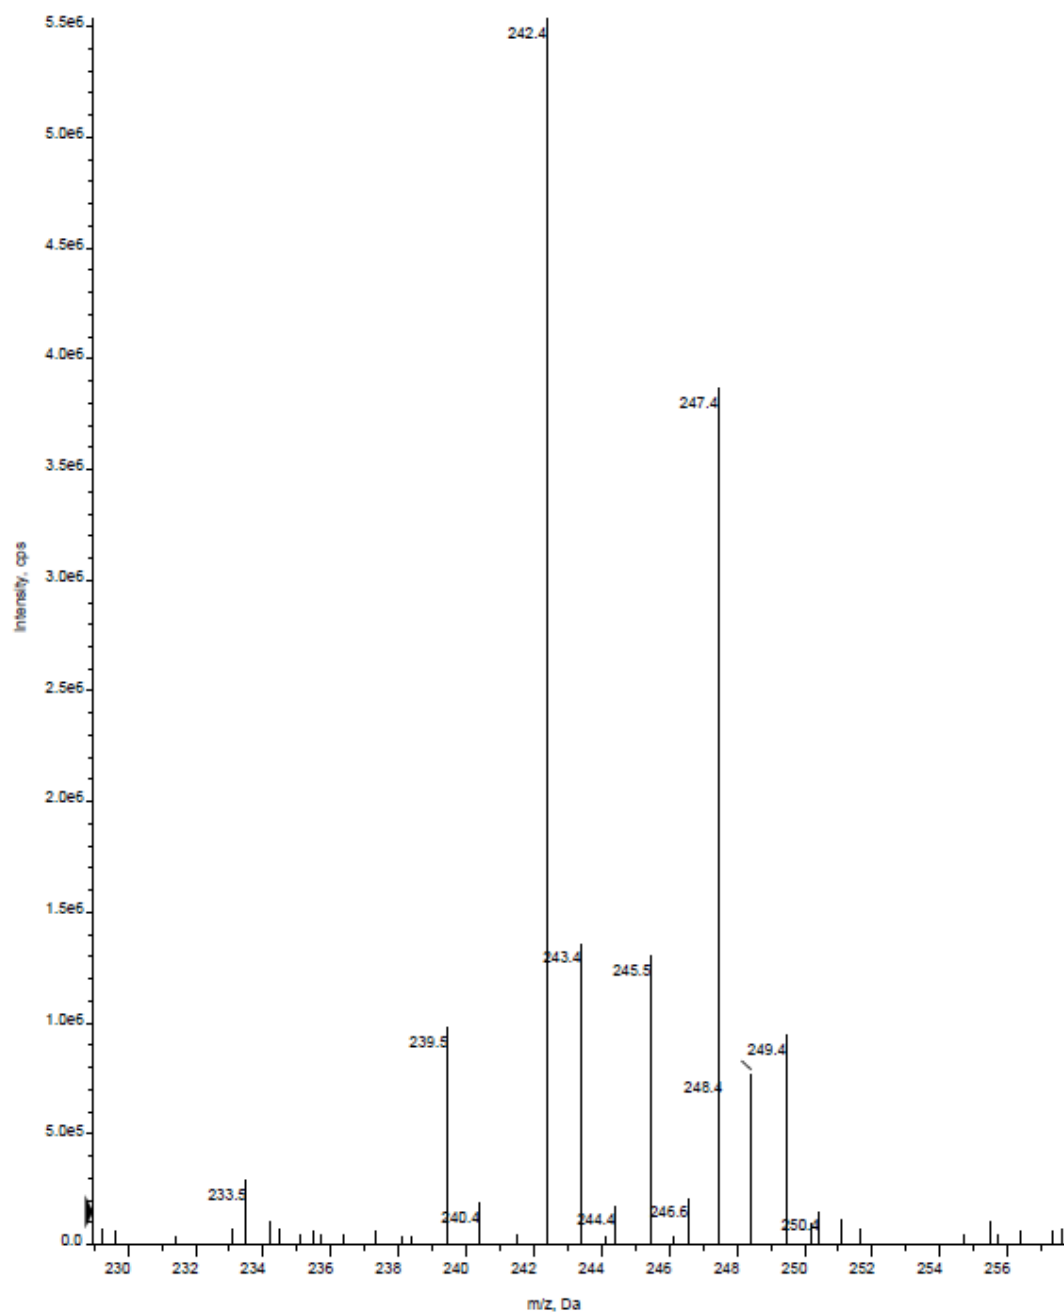

Calculated mass for  $C_{16}H_{13}N$ : 219.3. Observed mass in MS-ESI: 242.3  $[M+Na]^+$

**Figure S5.** Mass spectroscopy of 2,3-diphenylbut-2-enenitrile

## NMR spectra of synthesized compounds

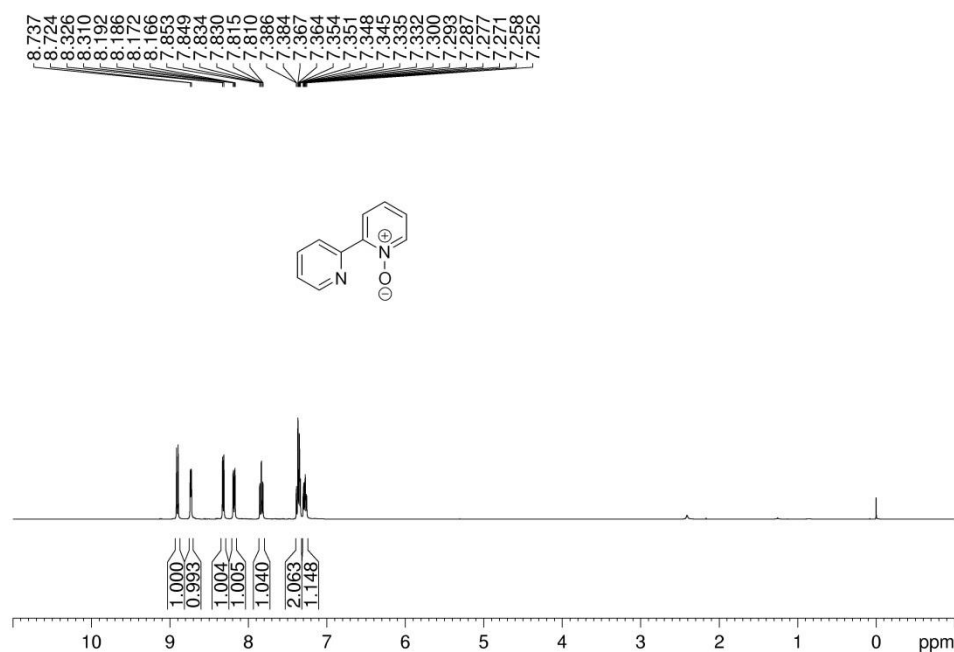

**Figure S6.** <sup>1</sup>H NMR of 2,2'-bipyridine-*N*-oxide in CDCl<sub>3</sub>.

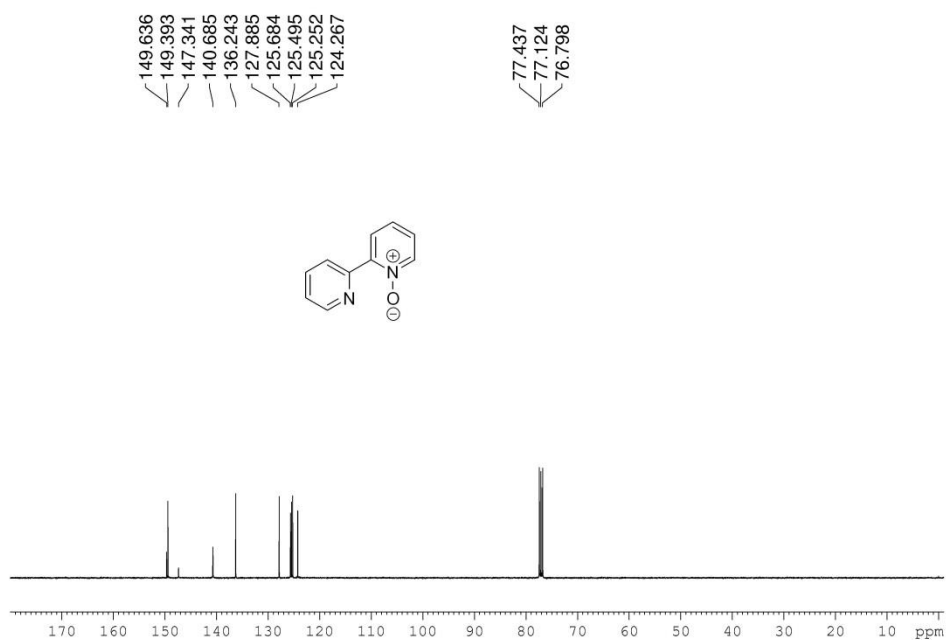

**Figure S7.** <sup>13</sup>C NMR of 2,2'-bipyridine-*N*-oxide in CDCl<sub>3</sub>.

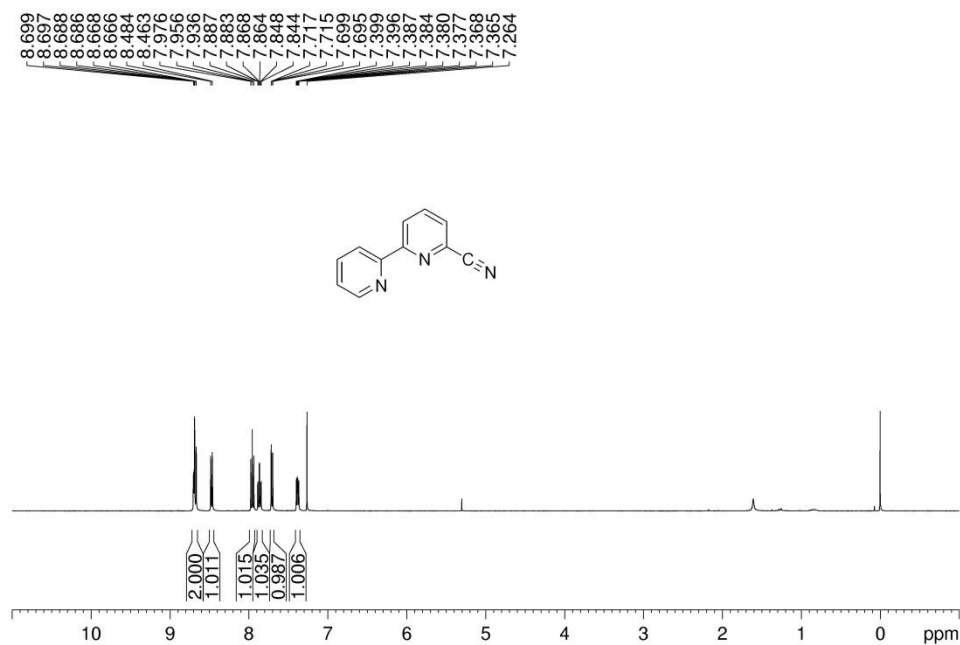

**Figure S8.** <sup>1</sup>H NMR of 2,2'-bipyridyl-6-carbonitrile in CDCl<sub>3</sub>.

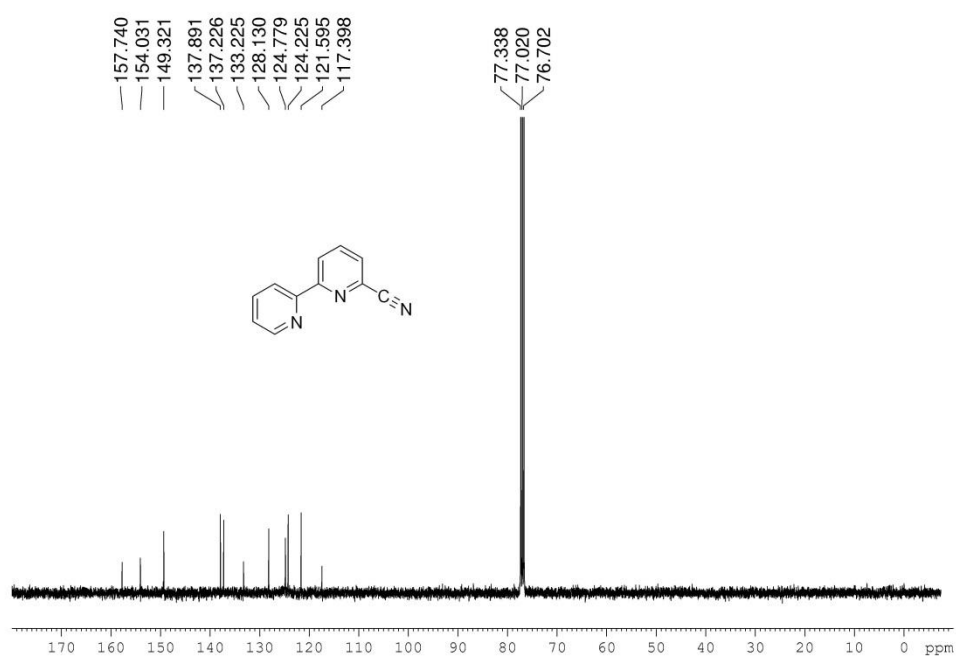

**Figure S9.** <sup>13</sup>C NMR of 2,2'-bipyridyl-6-carbonitrile in CDCl<sub>3</sub>.



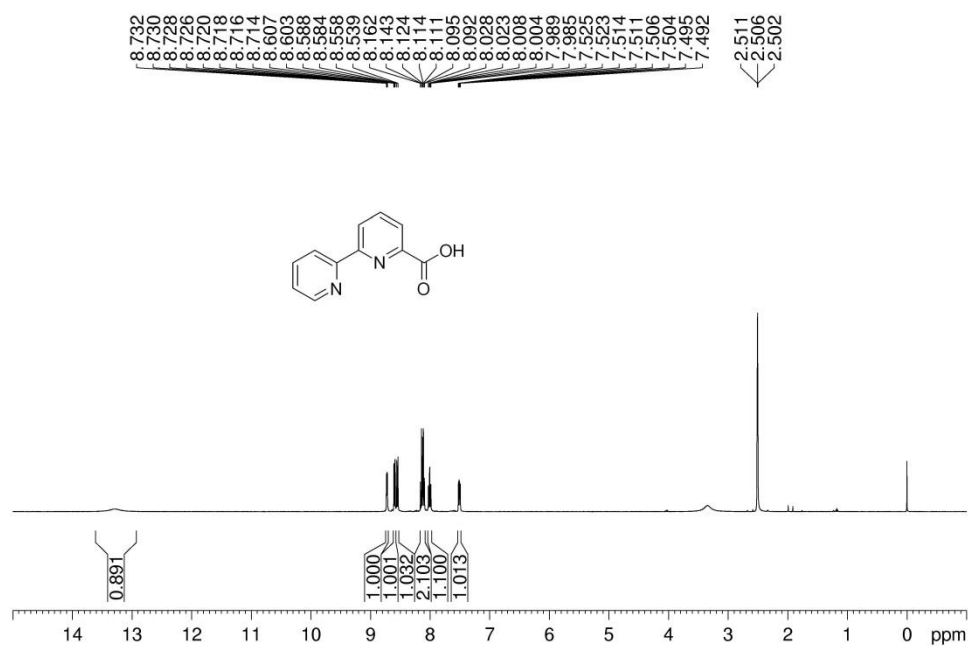

**Figure S10.** <sup>1</sup>H NMR of 2,2'-bipyridine-6-carboxylic acid in *d*<sub>6</sub>-DMSO.

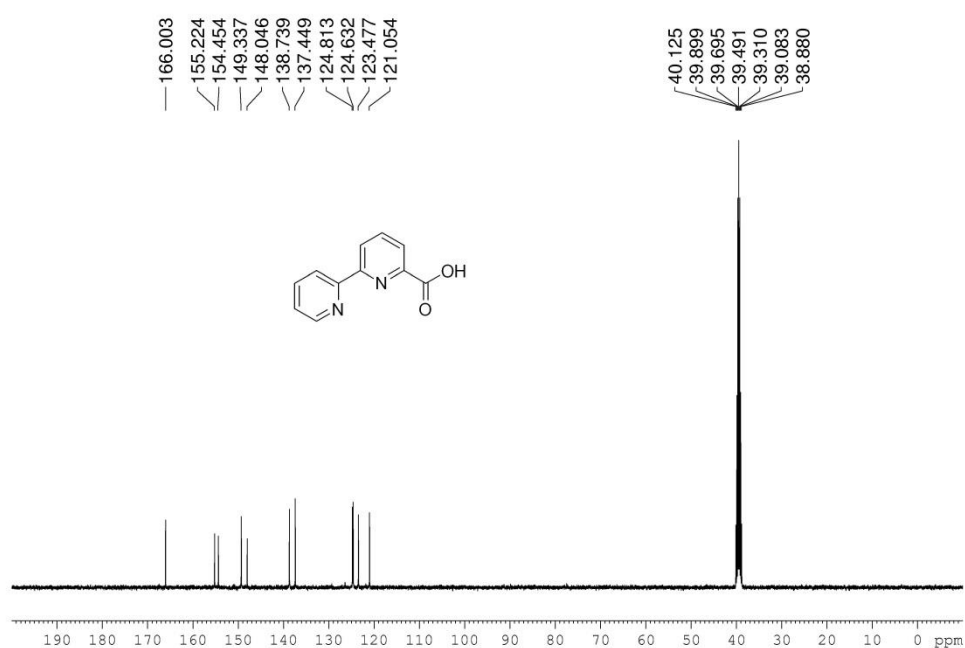

**Figure S11.** <sup>13</sup>C NMR of 2,2'-bipyridine-6-carboxylic acid in *d*<sub>6</sub>-DMSO.

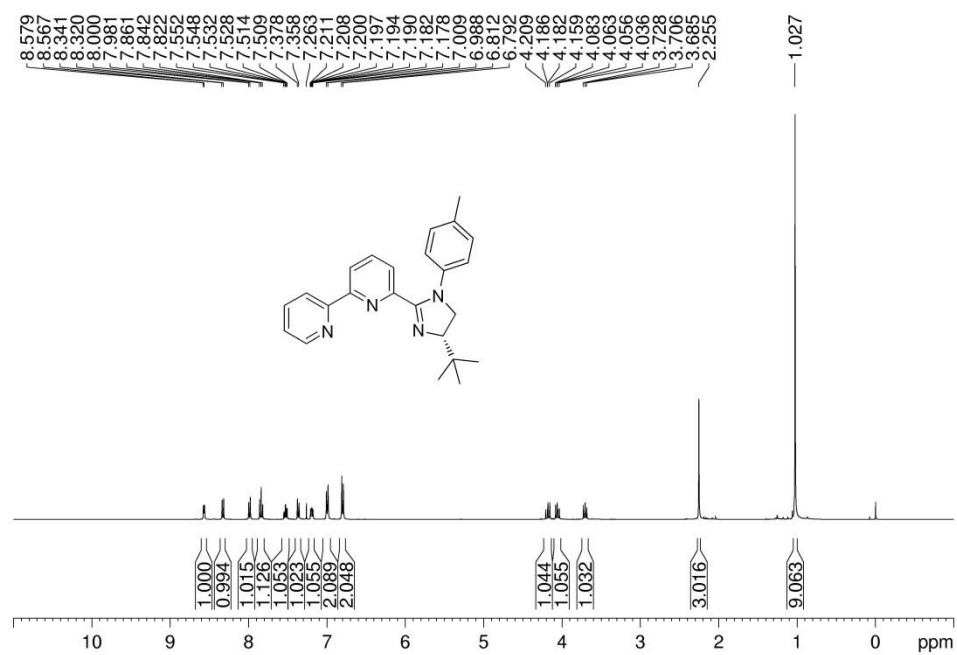

**Figure S12.** <sup>1</sup>H NMR of compound **1a** in CDCl<sub>3</sub>.

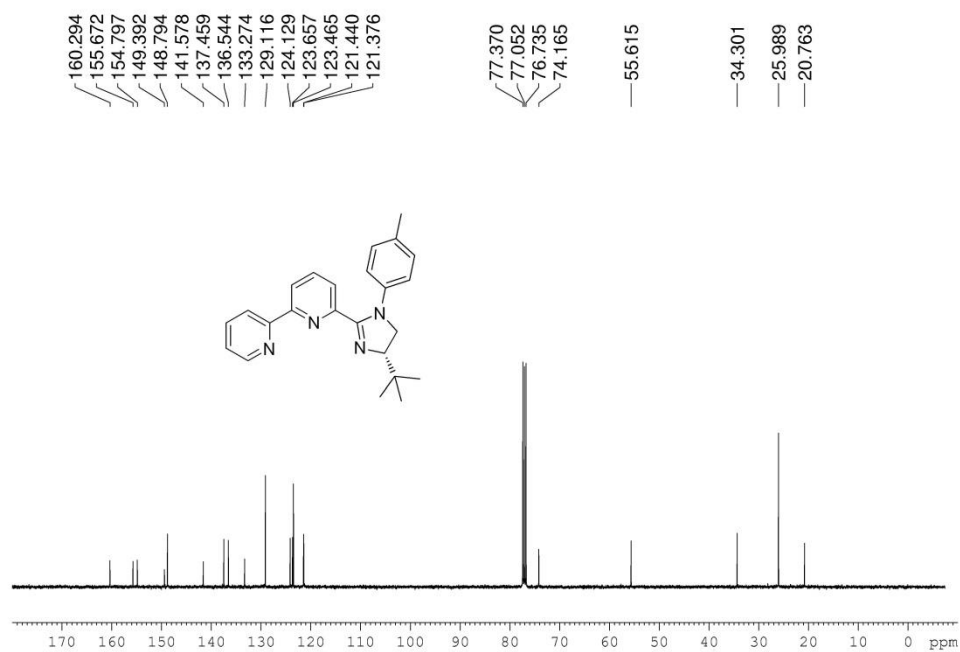

**Figure S13.** <sup>13</sup>C NMR of compound **1a** in CDCl<sub>3</sub>.

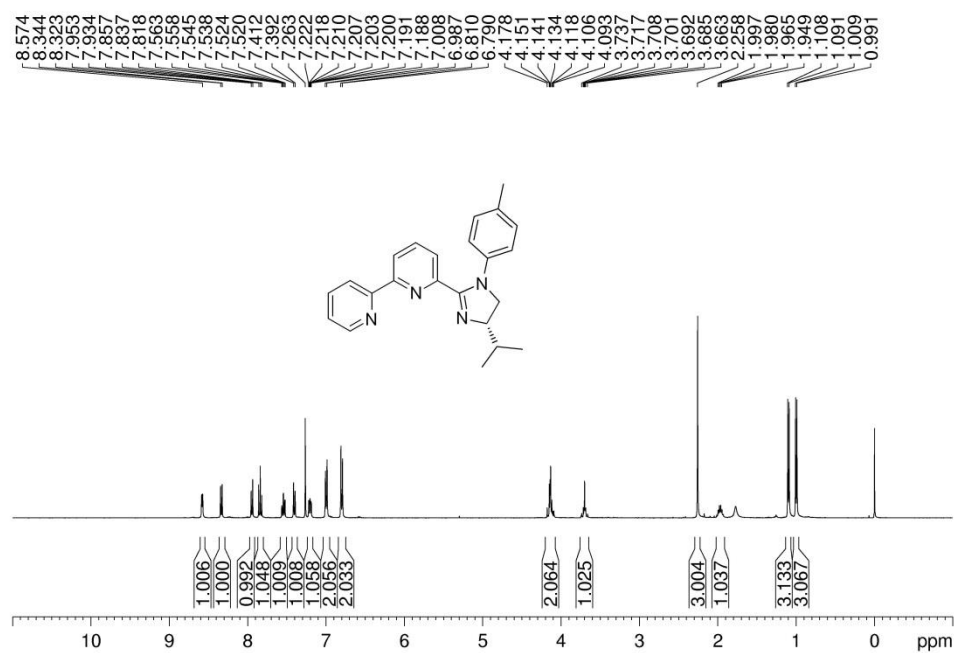

**Figure S14.** <sup>1</sup>H NMR of compound **1b** in CDCl<sub>3</sub>.

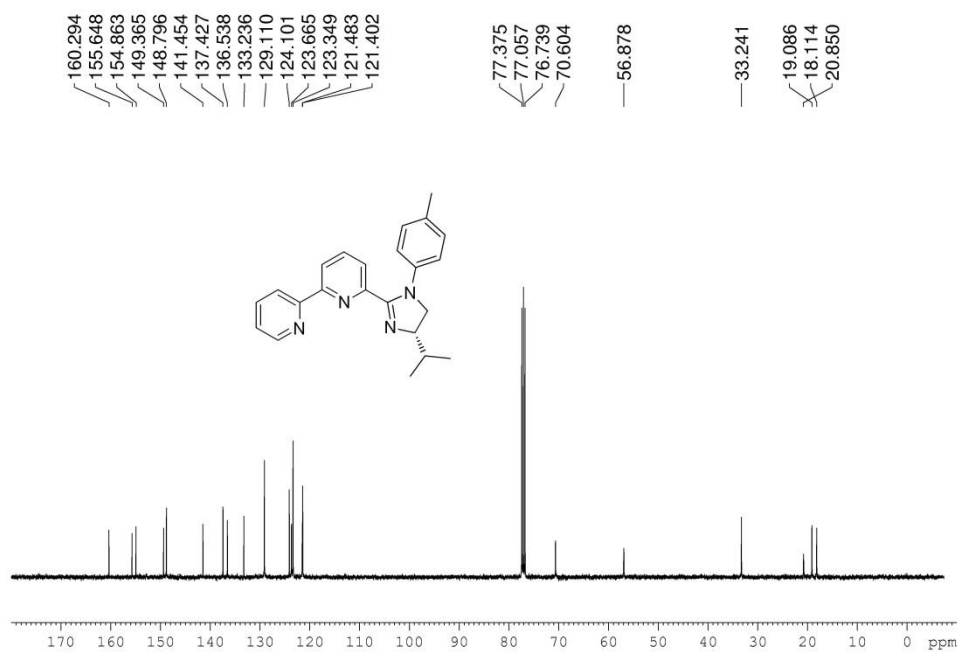

**Figure S15.** <sup>13</sup>C NMR of compound **1b** in CDCl<sub>3</sub>.

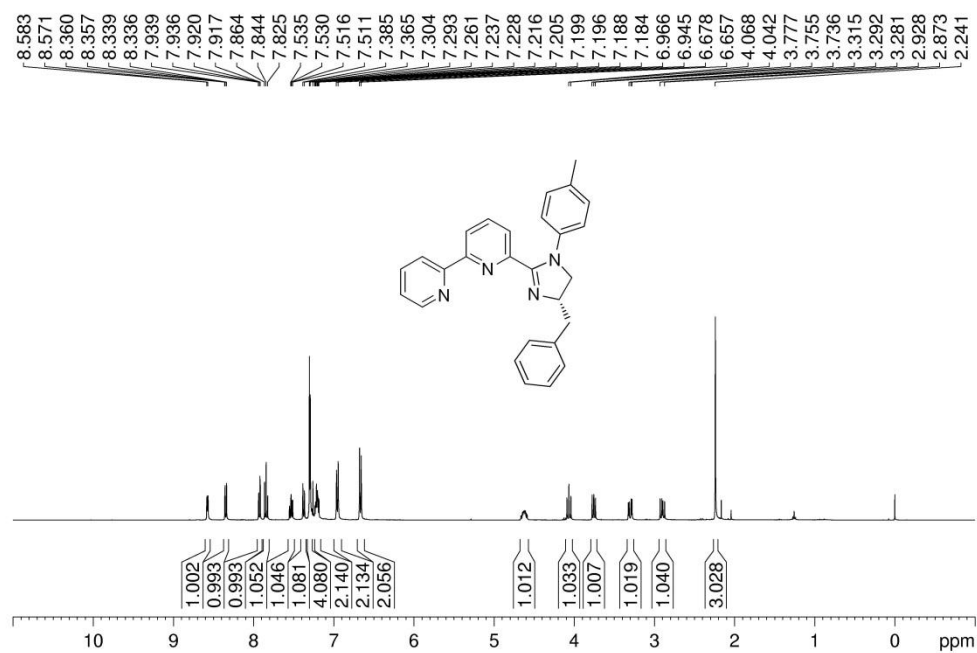

**Figure S16.** <sup>1</sup>H NMR of compound **1c** in CDCl<sub>3</sub>.

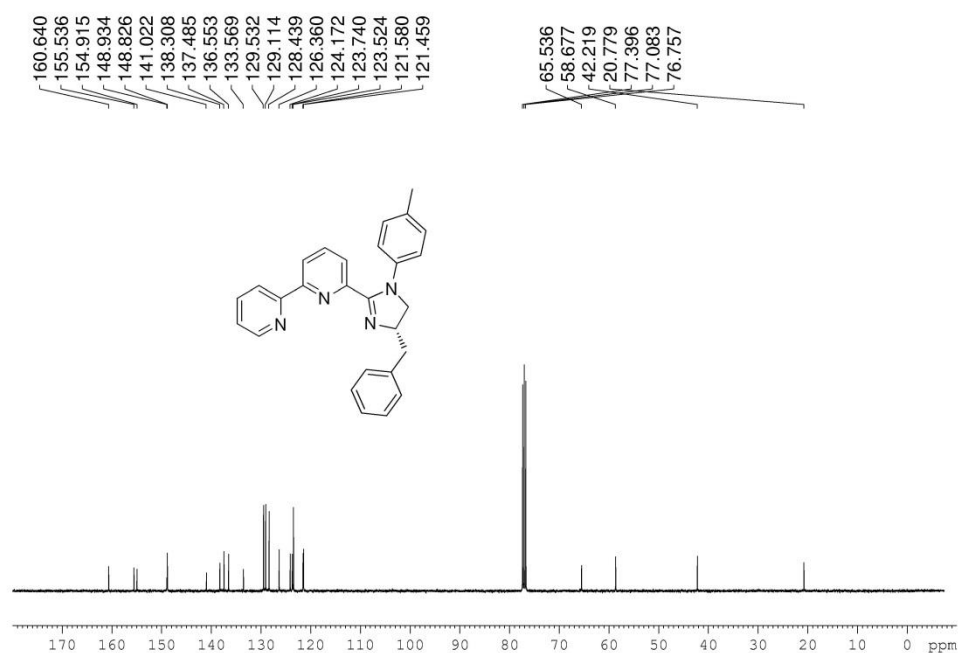

**Figure S17.** <sup>13</sup>C NMR of compound **1c** in CDCl<sub>3</sub>.

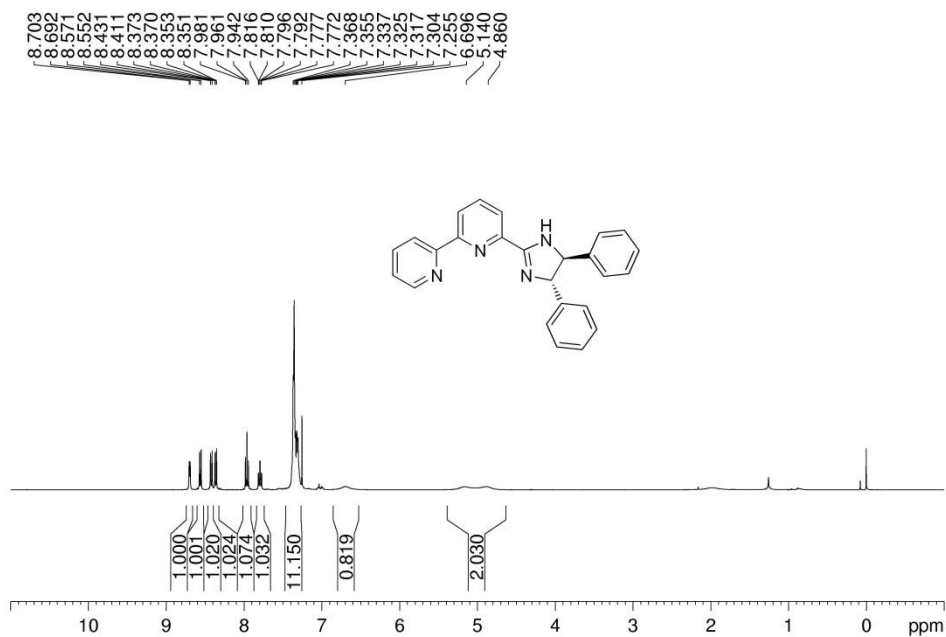

**Figure S18.** <sup>1</sup>H NMR of compound **1d** in CDCl<sub>3</sub>.

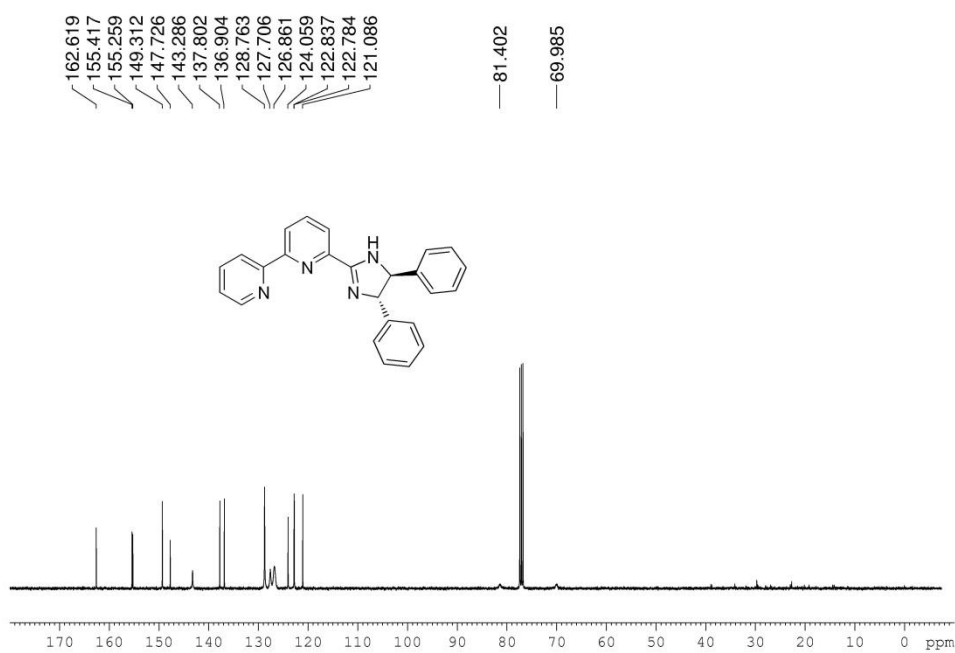

**Figure S19.** <sup>13</sup>C NMR of compound **1d** in CDCl<sub>3</sub>.



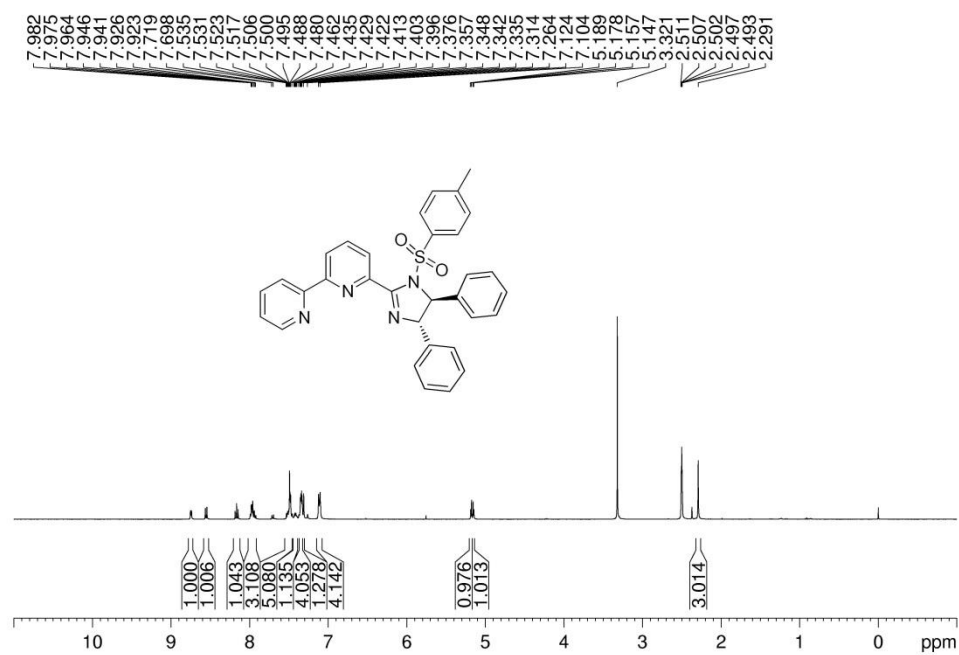

**Figure S22.** <sup>1</sup>H NMR of compound **1f** in d<sub>6</sub>-DMSO.

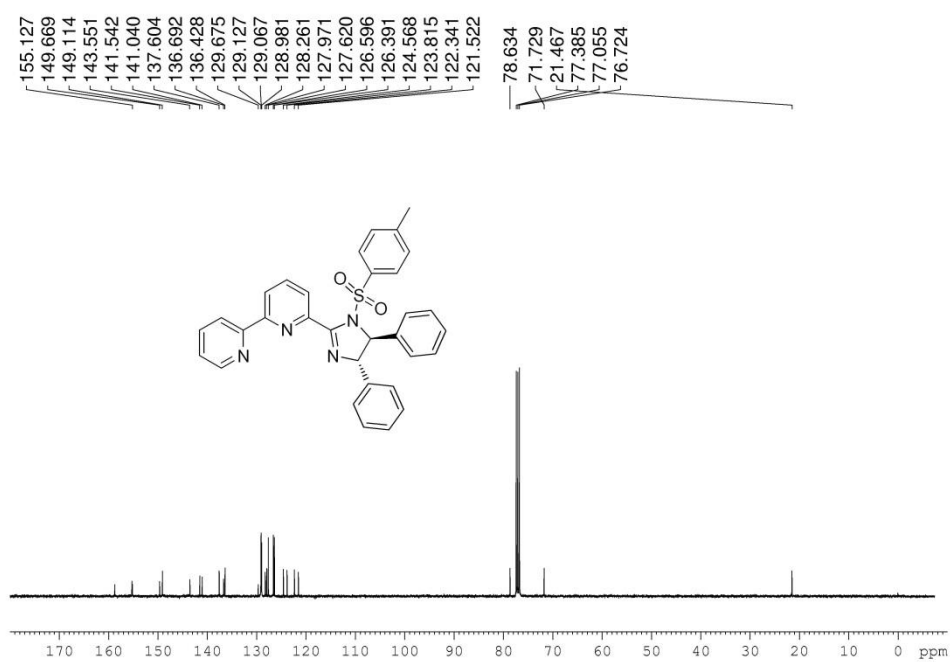

**Figure S23.** <sup>13</sup>C NMR of compound **1f** in CDCl<sub>3</sub>.

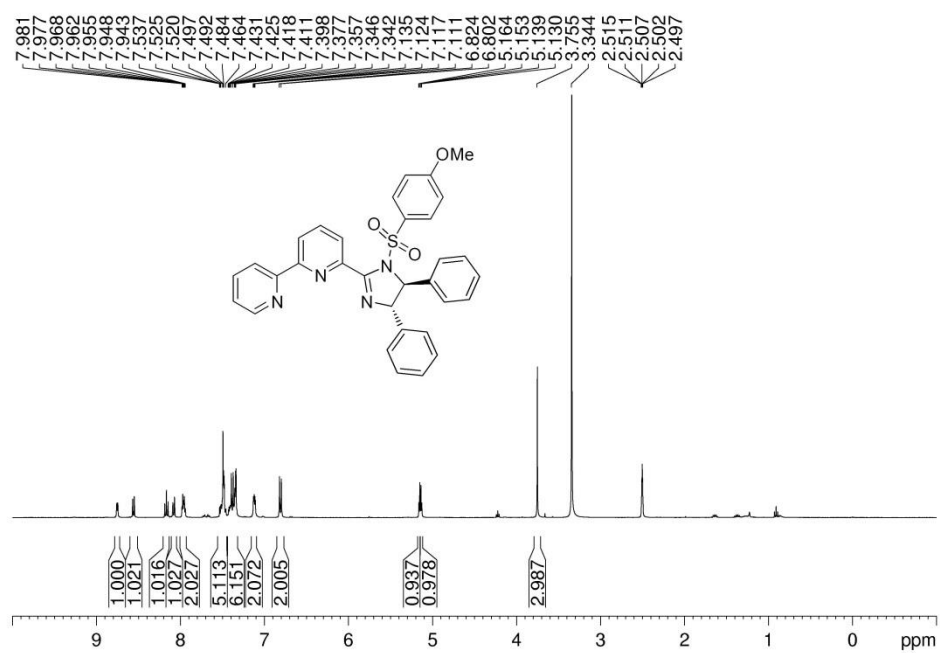

**Figure S24.** <sup>1</sup>H NMR of compound **1g** in *d*<sub>6</sub>-DMSO.

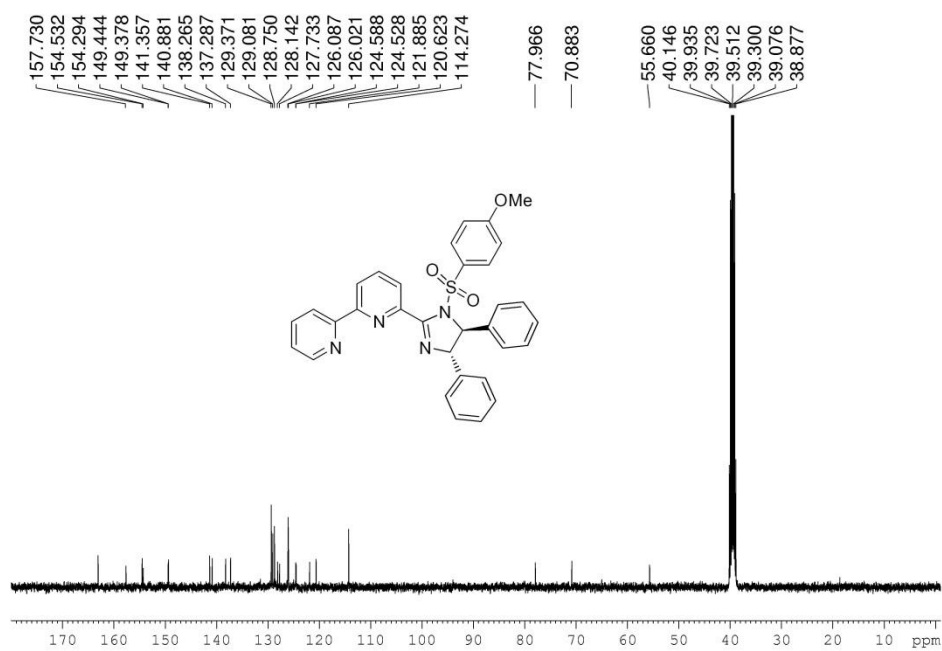

**Figure S25.** <sup>13</sup>C NMR of compound **1g** in *d*<sub>6</sub>-DMSO.



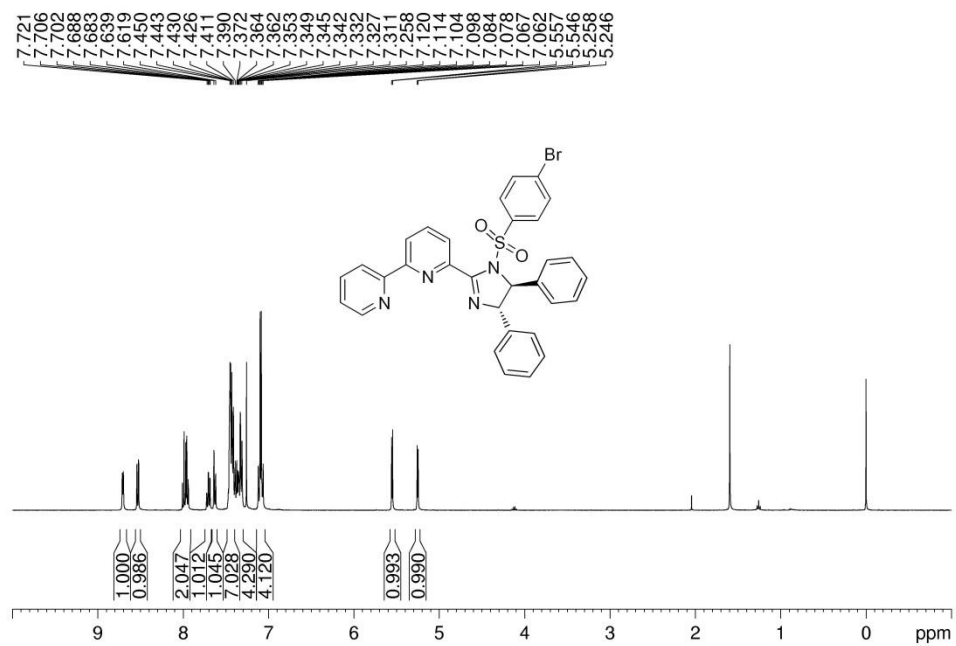

**Figure S26.** <sup>1</sup>H NMR of compound **1h** in CDCl<sub>3</sub>.

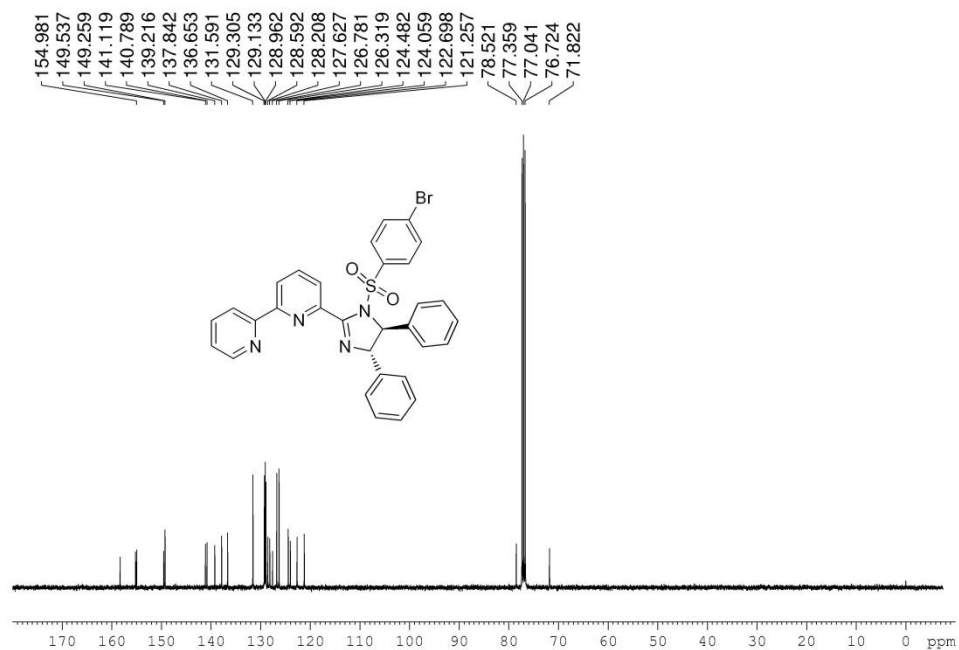

**Figure S27.** <sup>13</sup>C NMR of compound **1h** in CDCl<sub>3</sub>.

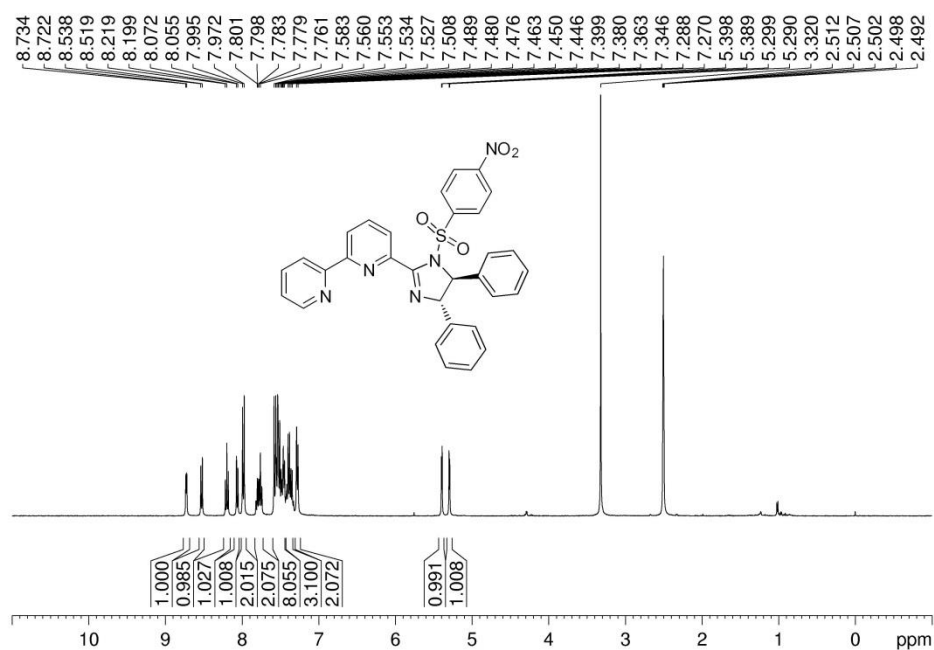

**Figure S28.** <sup>1</sup>H NMR of compound **1i** in *d*<sub>6</sub>-DMSO.

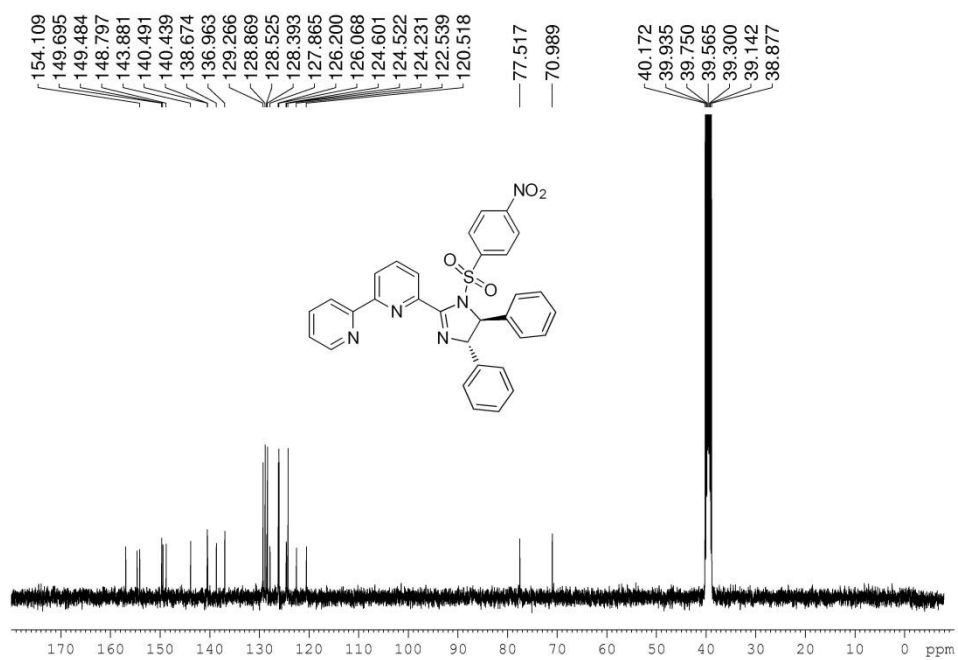

**Figure S29.** <sup>13</sup>C NMR of compound **1i** in *d*<sub>6</sub>-DMSO.

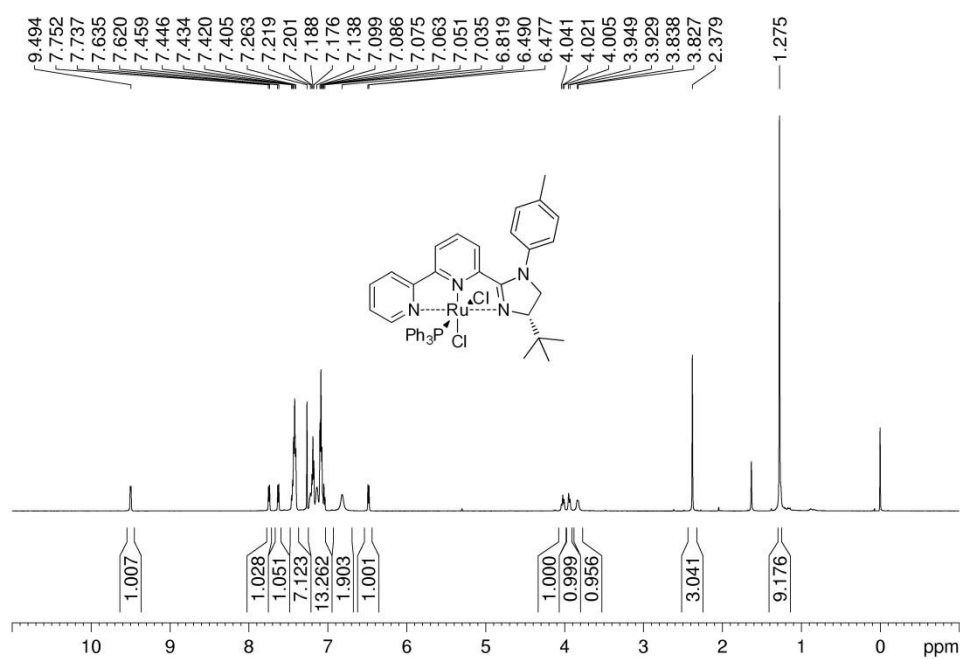

**Figure S30.** <sup>1</sup>H NMR of compound **2a** in CDCl<sub>3</sub>.

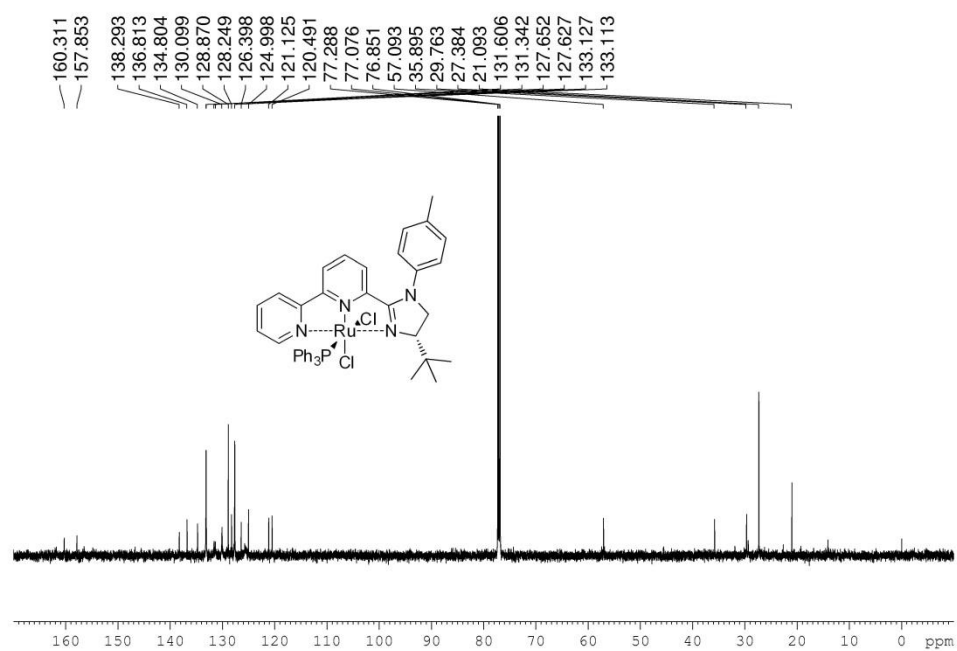

**Figure S31.** <sup>13</sup>C NMR of compound **2a** in CDCl<sub>3</sub>.

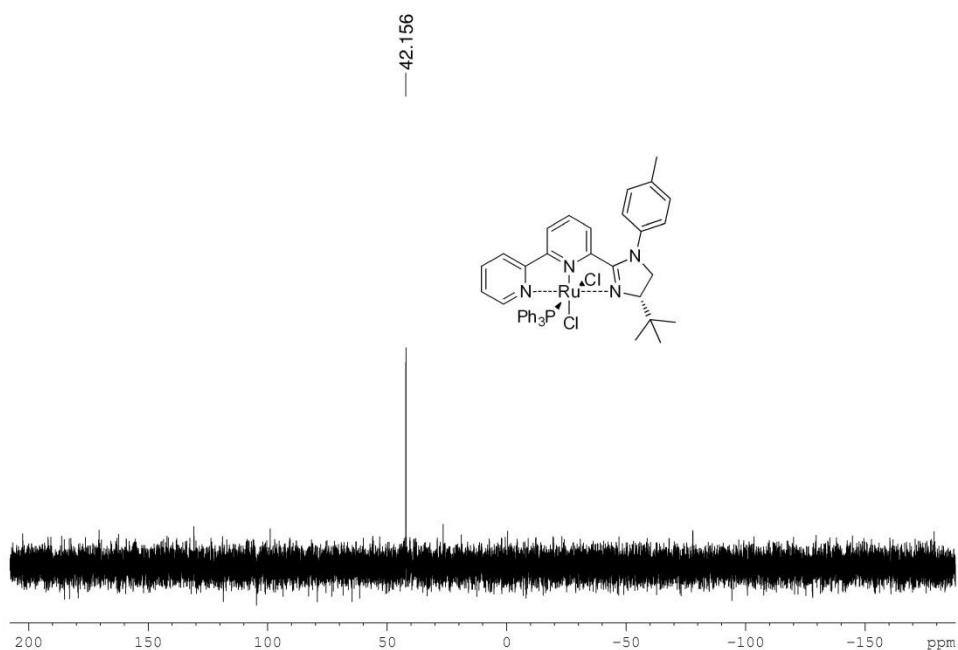

**Figure S32.**  $^{31}\text{P}$  NMR of compound **2a** in  $\text{CDCl}_3$ .

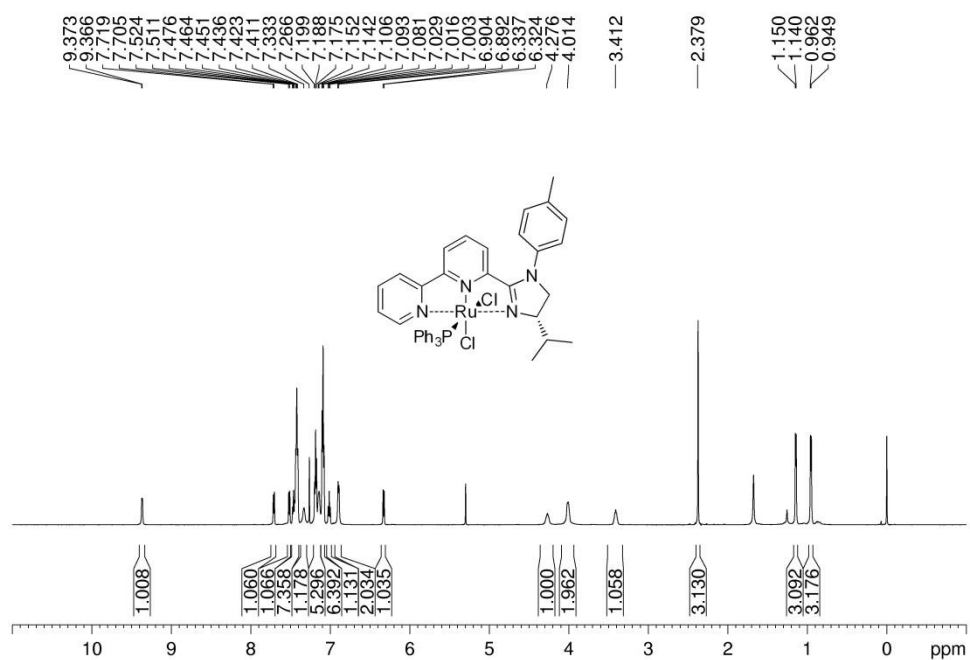

**Figure S33.**  $^1\text{H}$  NMR of compound **2b** in  $\text{CDCl}_3$ .

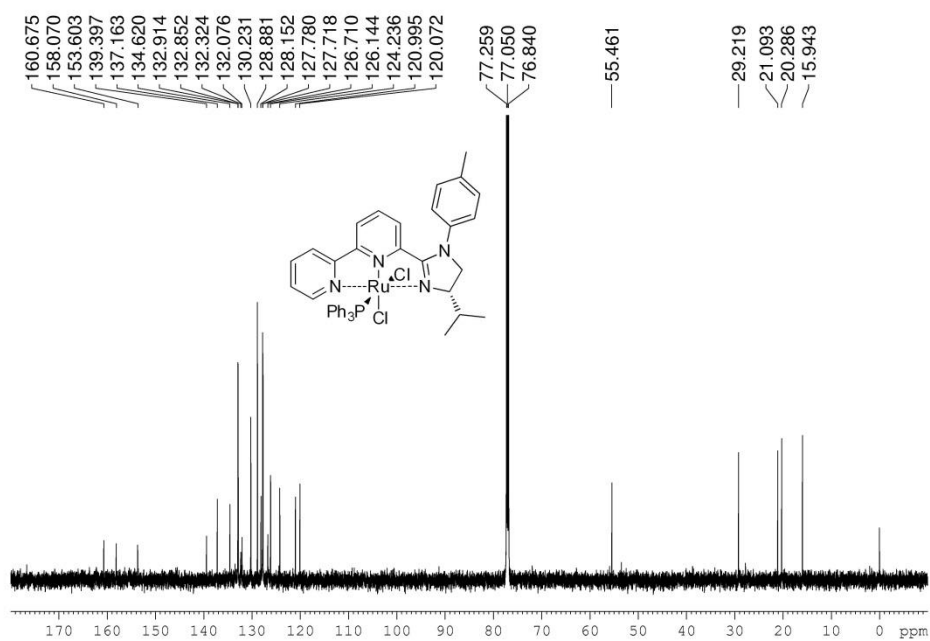

**Figure S34.** <sup>13</sup>C NMR of compound **2b** in CDCl<sub>3</sub>.

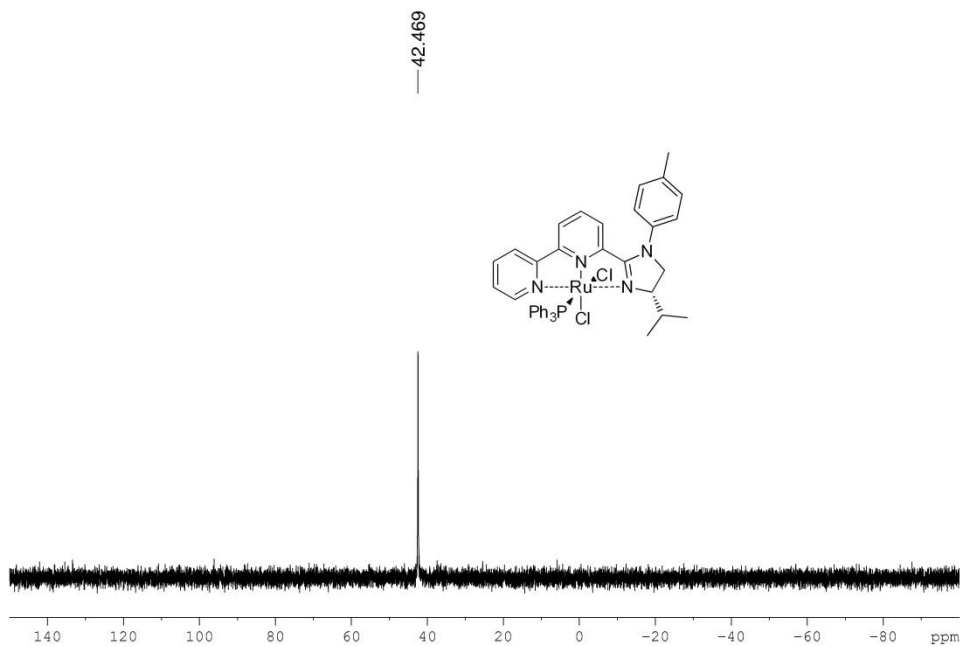

**Figure S35.** <sup>31</sup>P NMR of compound **2b** in CDCl<sub>3</sub>.

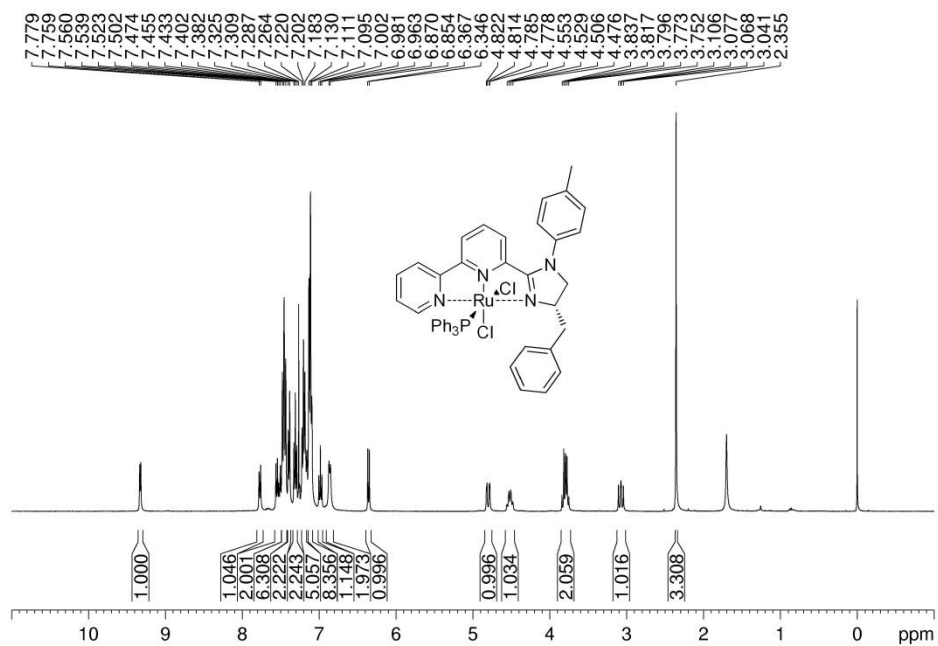

**Figure S36.** <sup>1</sup>H NMR of compound **2c** in CDCl<sub>3</sub>.

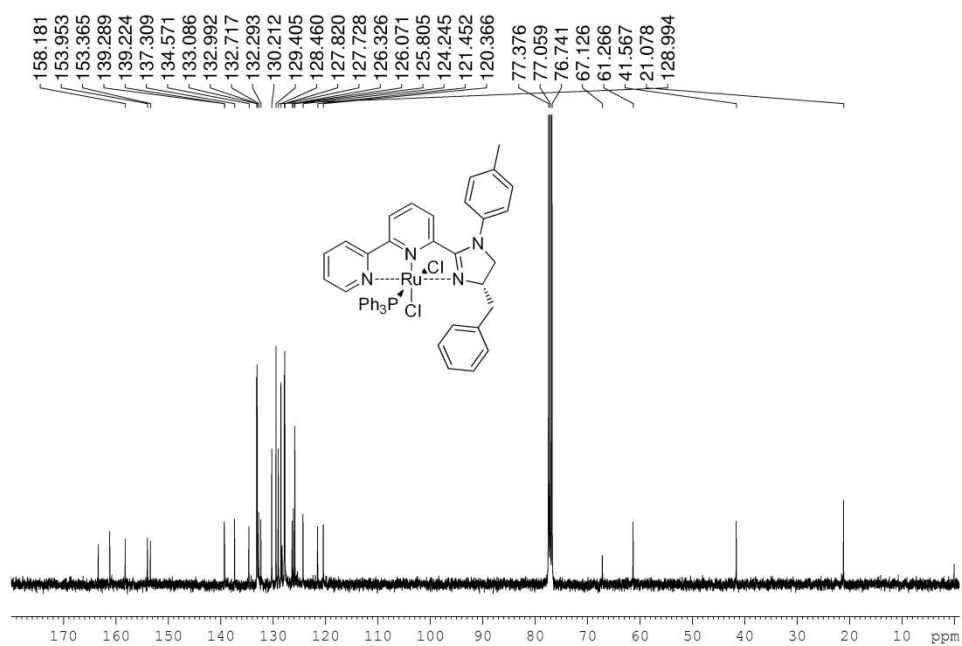

**Figure S37.** <sup>13</sup>C NMR of compound **2c** in CDCl<sub>3</sub>.

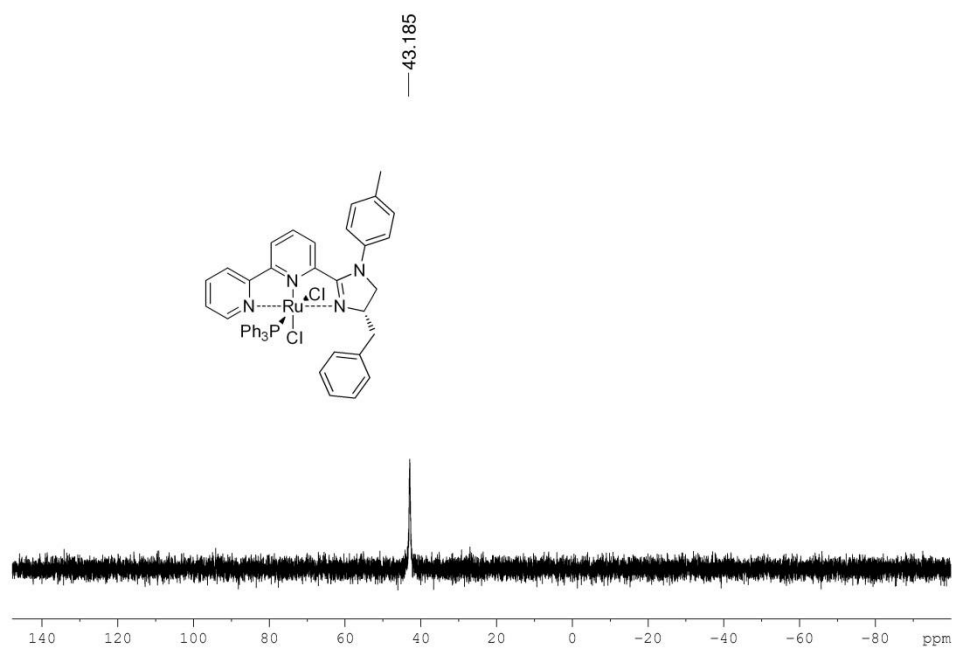

**Figure S38.**  $^{31}\text{P}$  NMR of compound **2c** in  $\text{CDCl}_3$ .

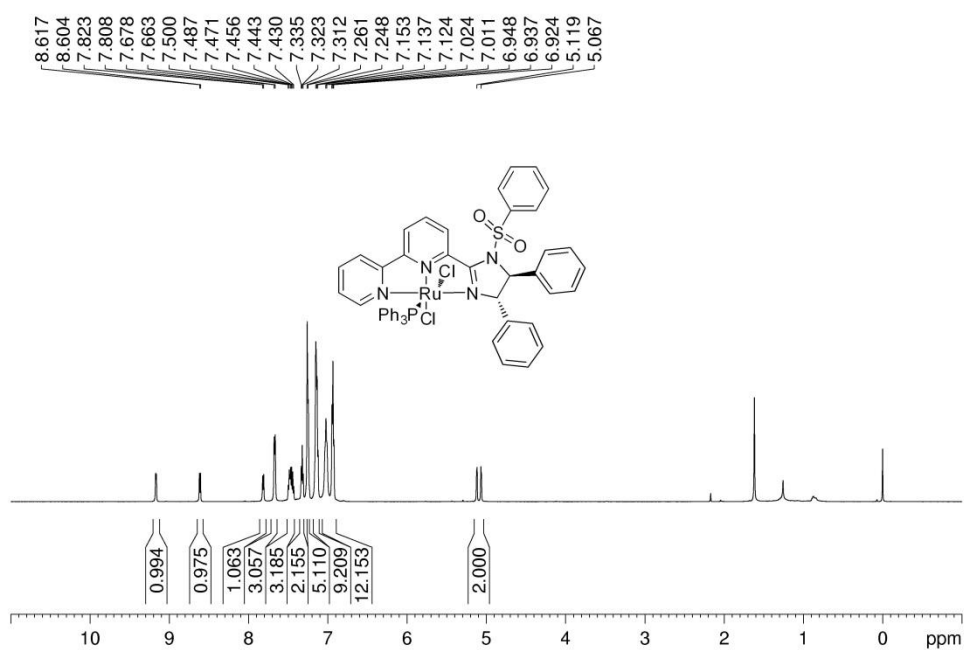

**Figure S39.**  $^1\text{H}$  NMR of compound **2d** in  $\text{CDCl}_3$ .

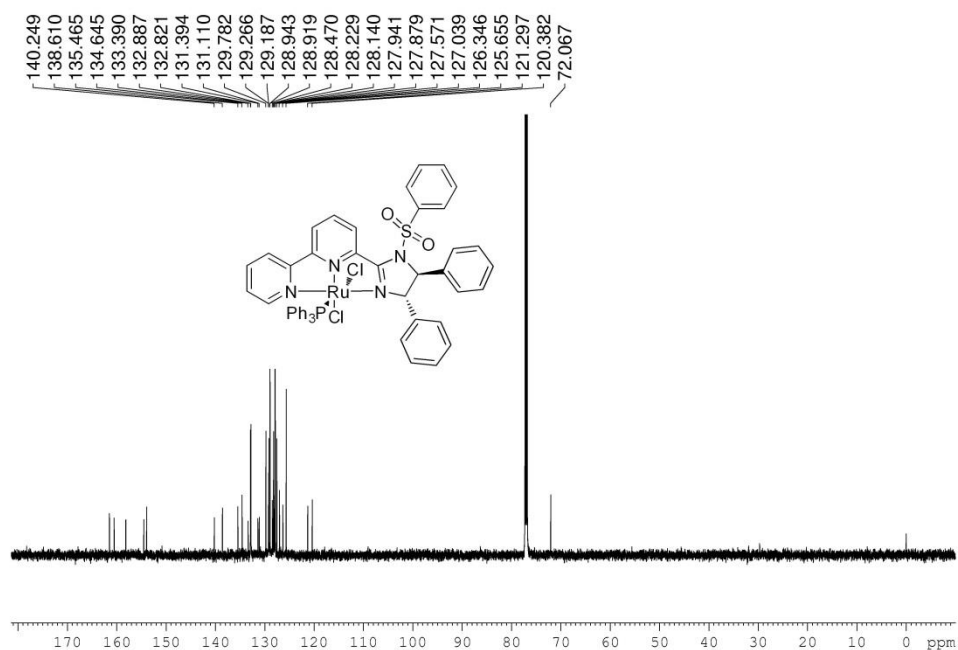

**Figure S40.** <sup>13</sup>C NMR of compound **2d** in CDCl<sub>3</sub>.

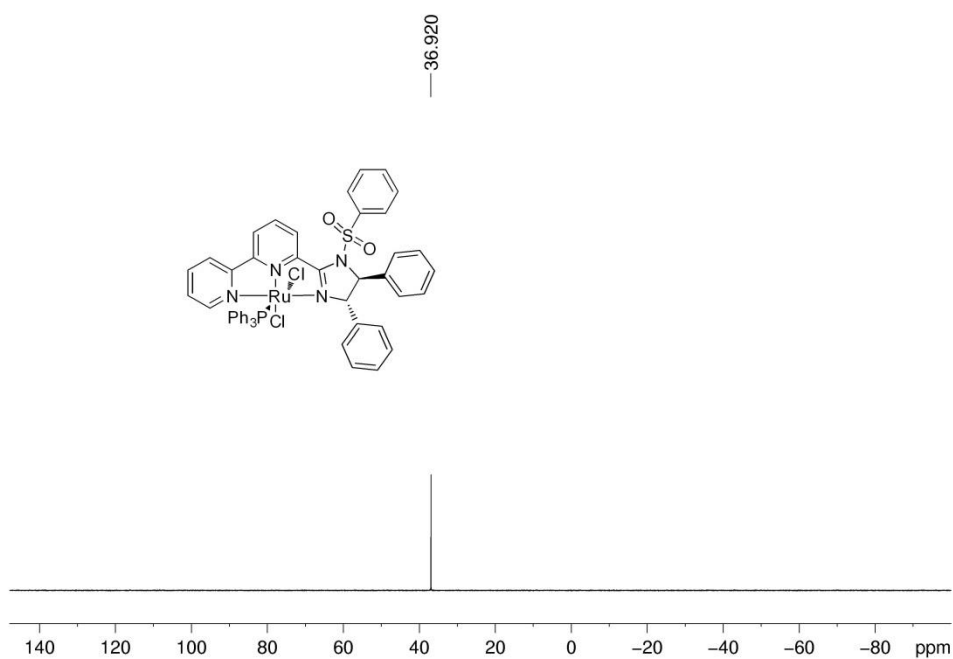

**Figure S41.** <sup>31</sup>P NMR of compound **2d** in CDCl<sub>3</sub>.



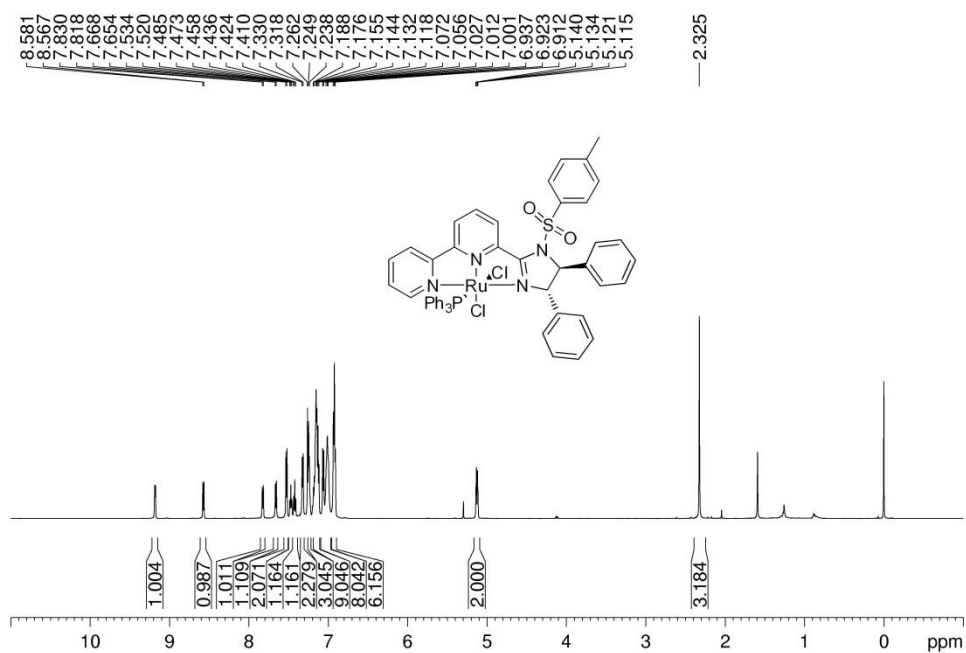

**Figure S42.** <sup>1</sup>H NMR of compound **2e** in CDCl<sub>3</sub>.

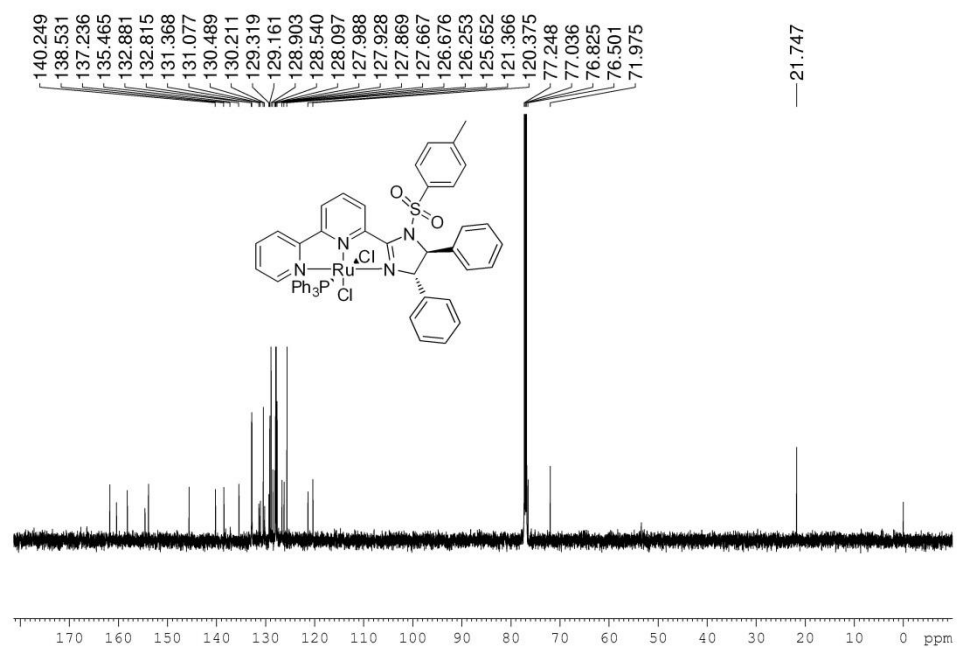

**Figure S43.** <sup>13</sup>C NMR of compound **2e** in CDCl<sub>3</sub>.

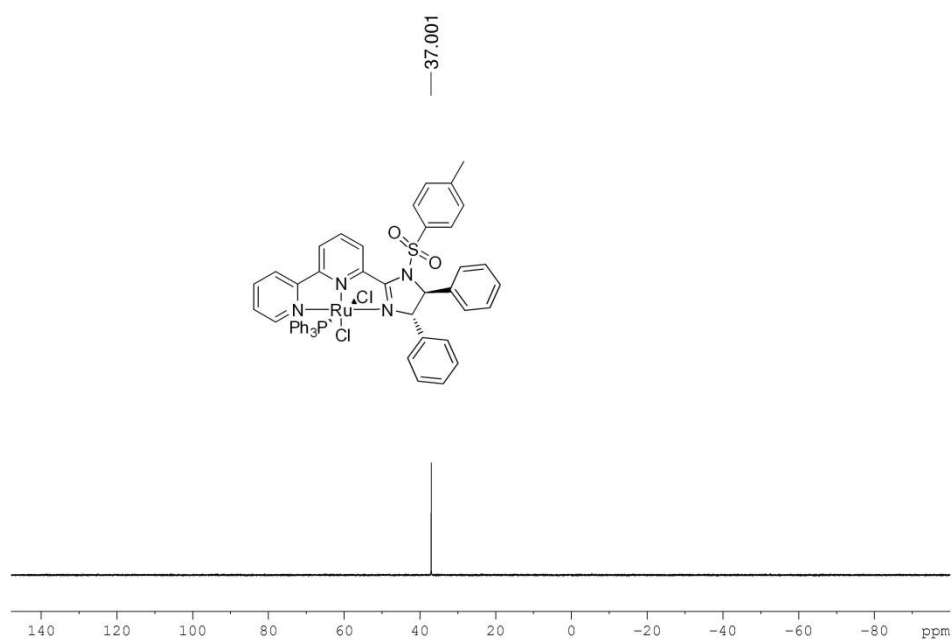

**Figure S44.**  $^{31}\text{P}$  NMR of compound **2e** in  $\text{CDCl}_3$ .

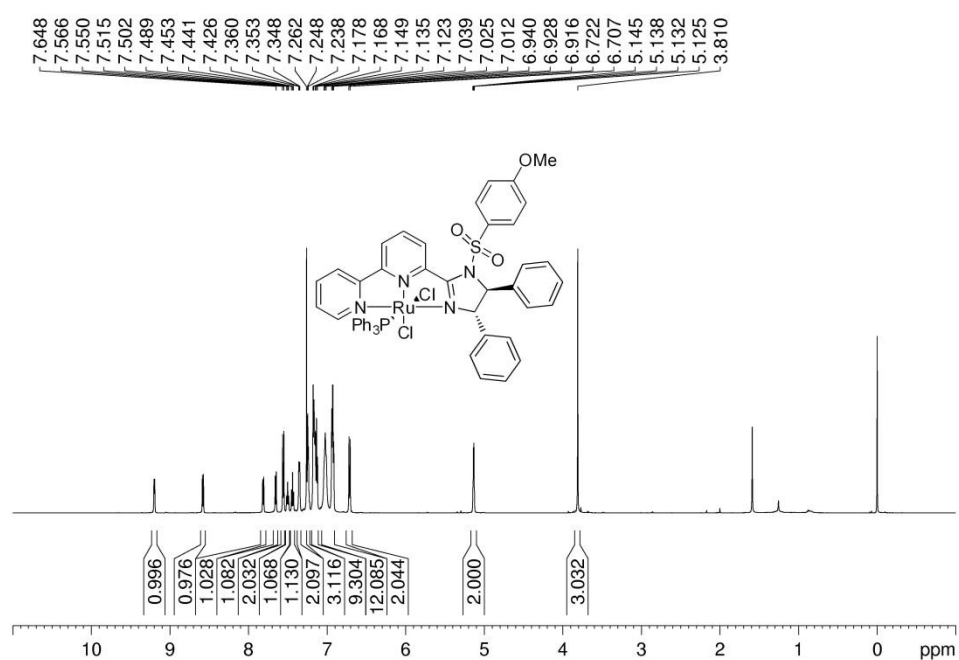

**Figure S45.**  $^1\text{H}$  NMR of compound **2f** in  $\text{CDCl}_3$ .

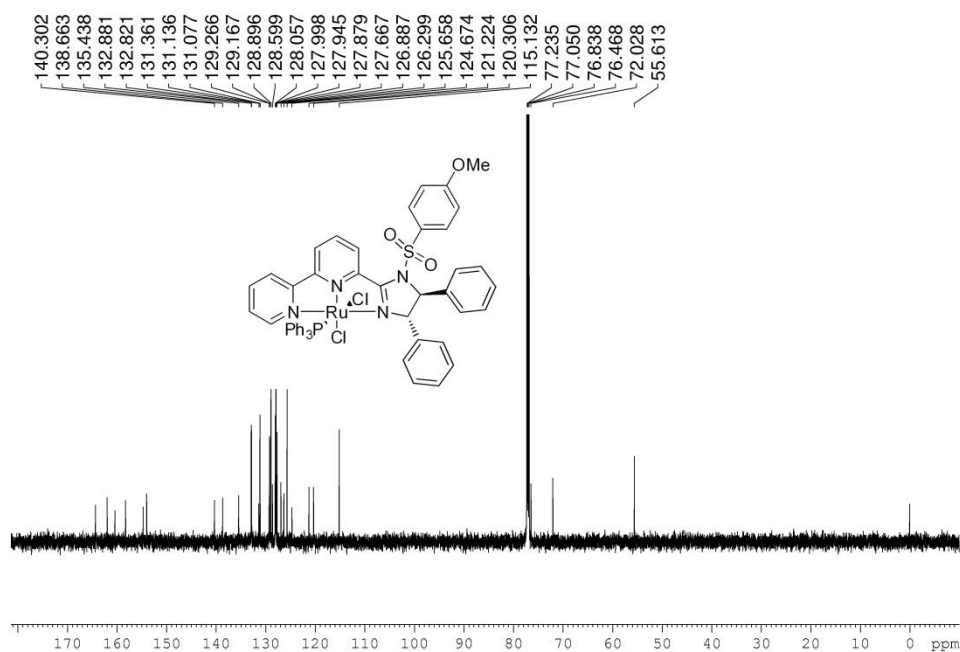

**Figure S46.**  $^{13}\text{C}$  NMR of compound **2f** in  $\text{CDCl}_3$ .

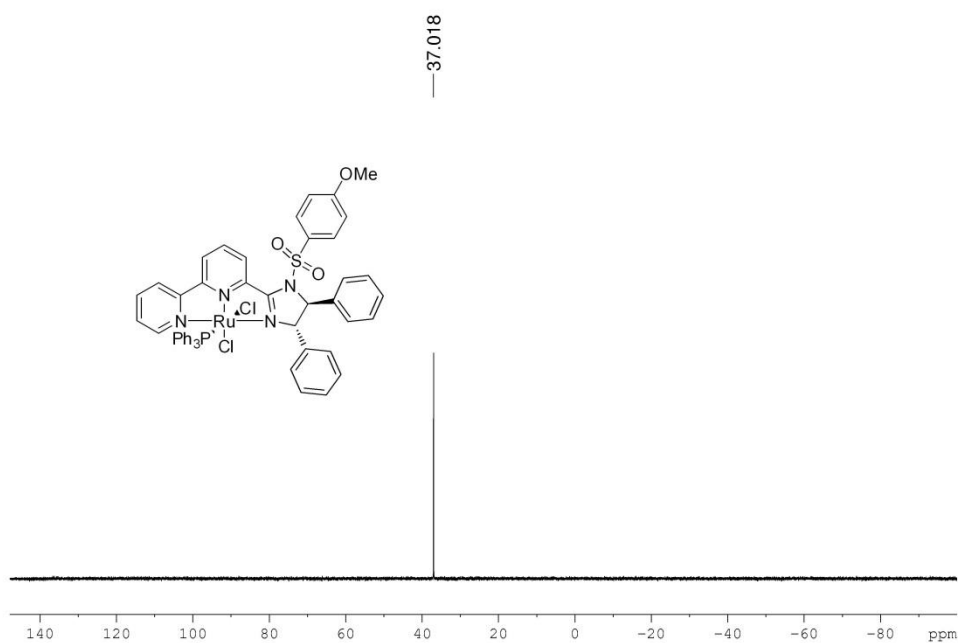

**Figure S47.**  $^{31}\text{P}$  NMR of compound **2f** in  $\text{CDCl}_3$ .

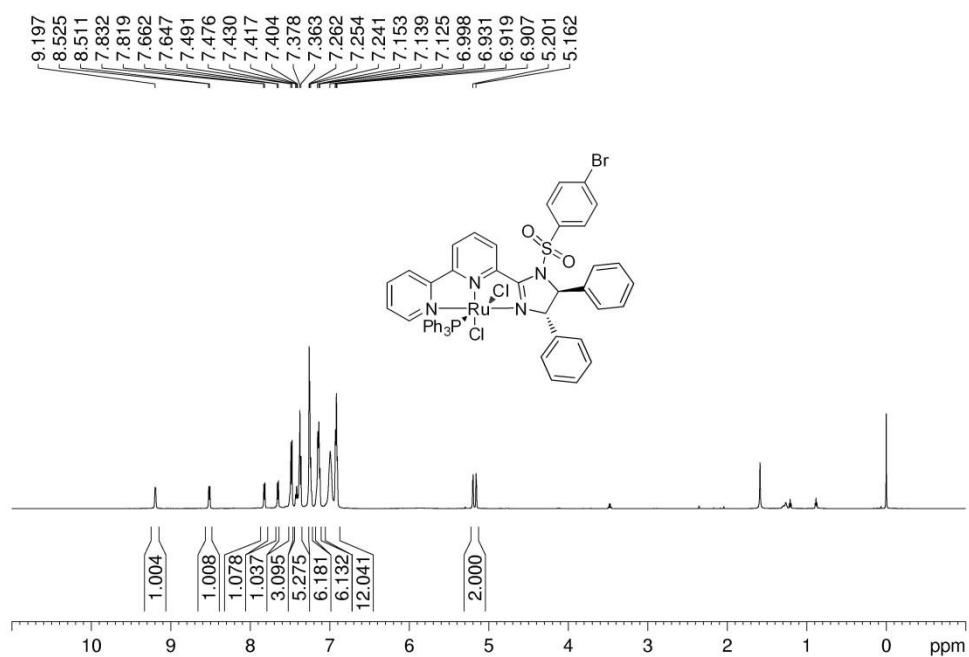

**Figure S48.** <sup>1</sup>H NMR of compound **2g** in CDCl<sub>3</sub>.

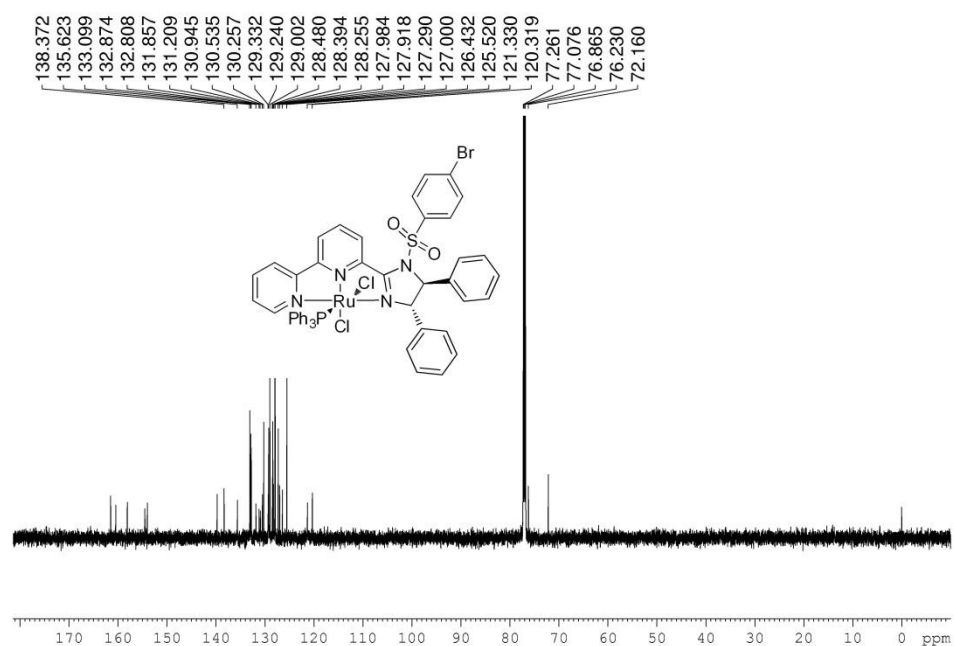

**Figure S49.** <sup>13</sup>C NMR of compound **2g** in CDCl<sub>3</sub>.

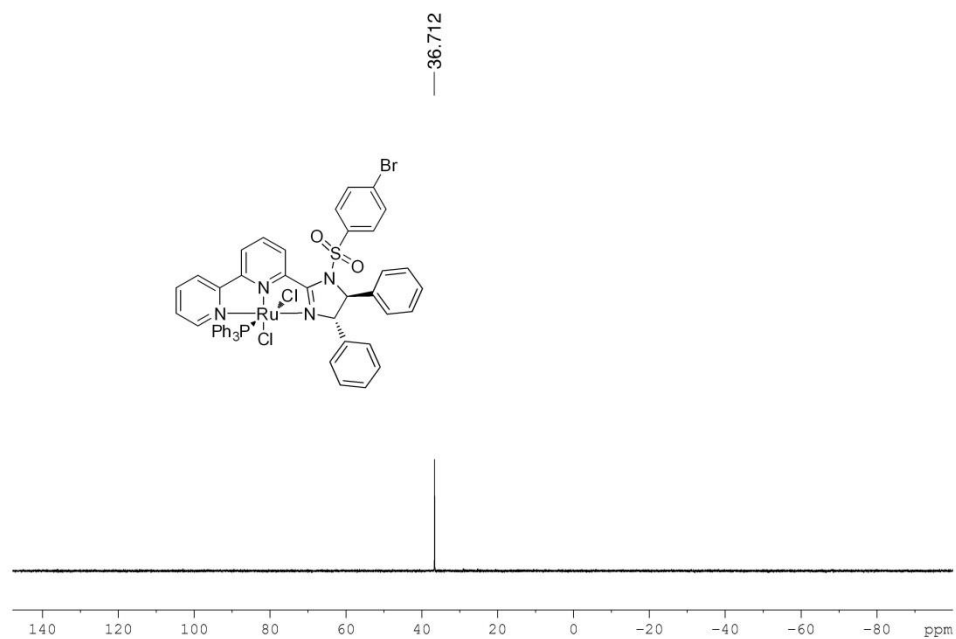

**Figure S50.**  $^{31}\text{P}$  NMR of compound **2g** in  $\text{CDCl}_3$ .

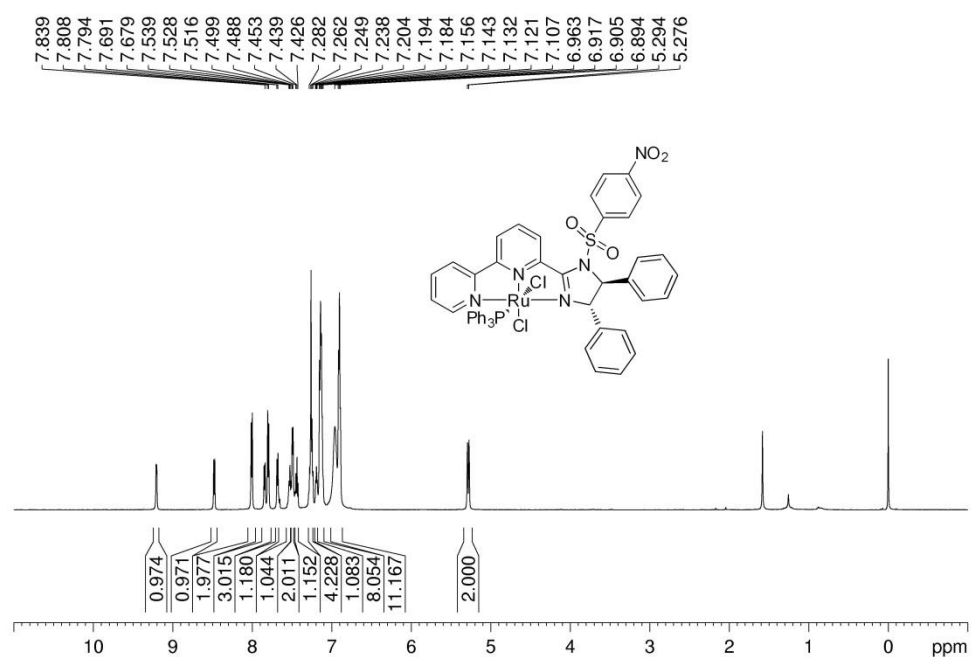

**Figure S51.**  $^1\text{H}$  NMR of compound **2h** in  $\text{CDCl}_3$ .

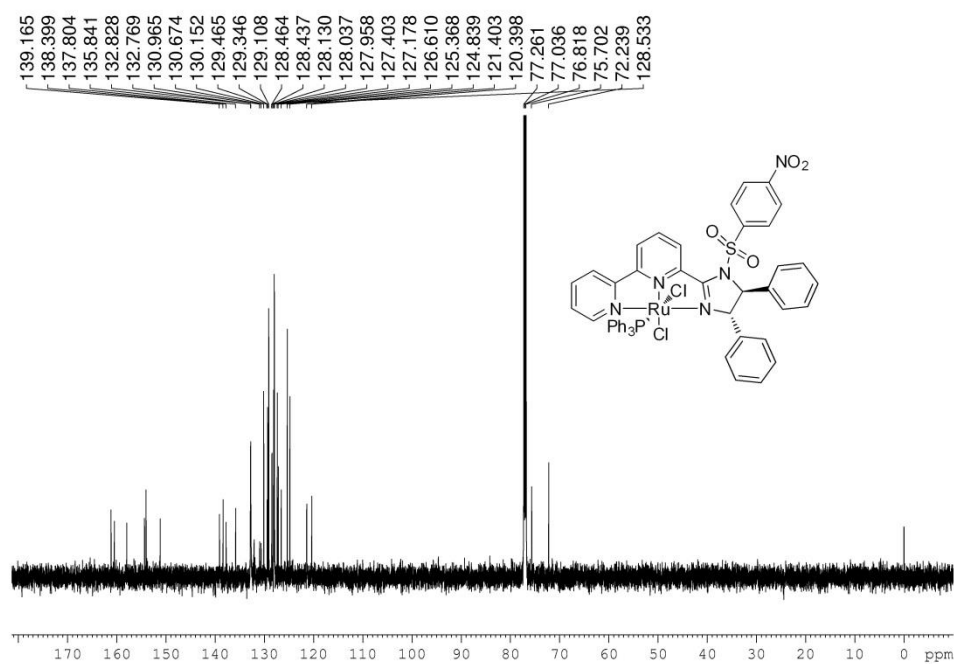

**Figure S52.** <sup>13</sup>C NMR of compound **2h** in CDCl<sub>3</sub>.

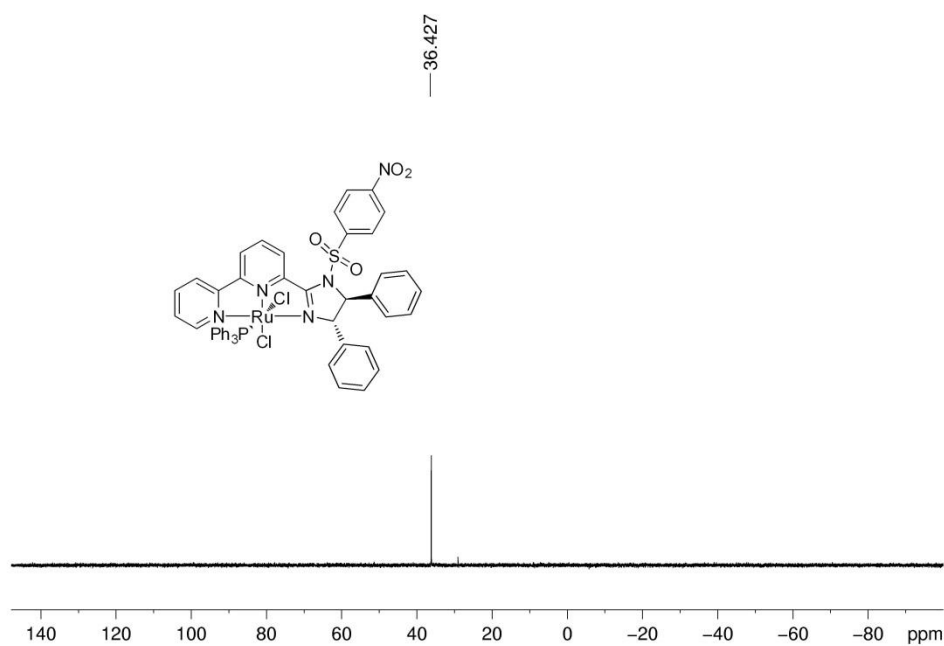

**Figure S53.** <sup>31</sup>P NMR of compound **2h** in CDCl<sub>3</sub>.

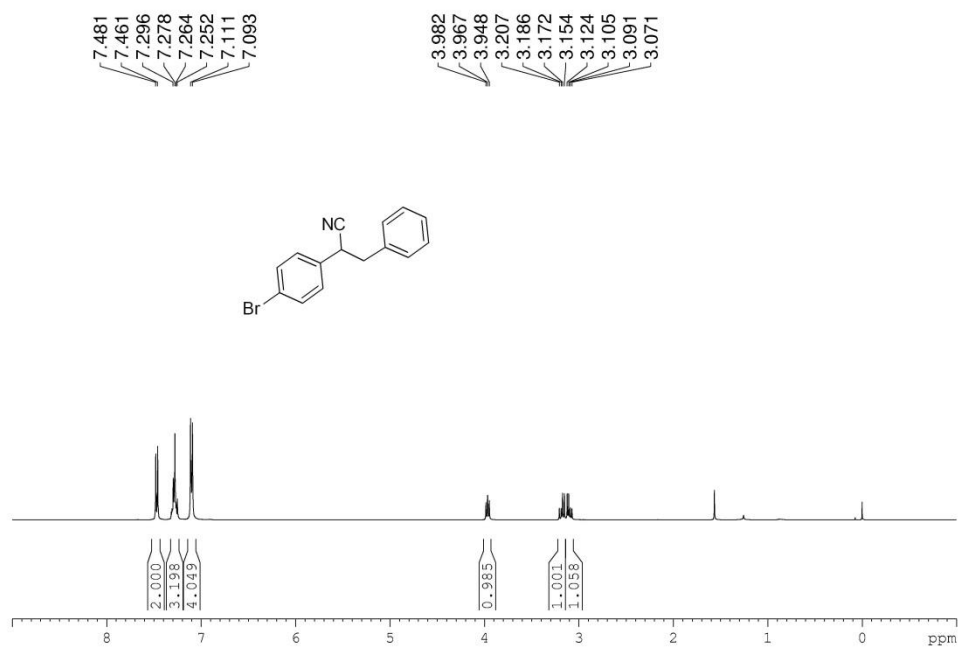

**Figure S54.** <sup>1</sup>H NMR of compound **5a** in CDCl<sub>3</sub>.

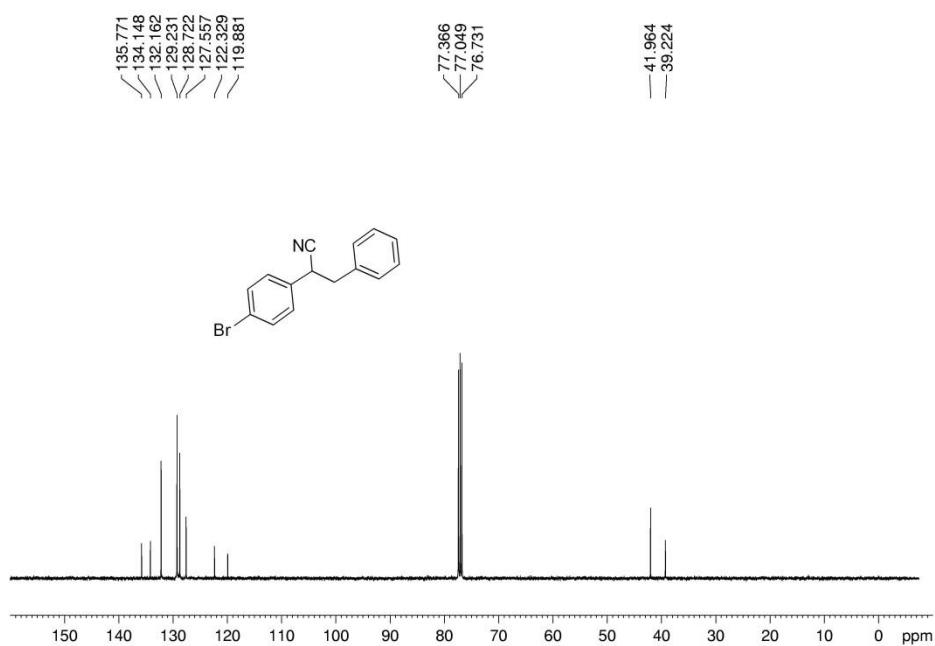

**Figure S55.** <sup>13</sup>C NMR of compound **5a** in CDCl<sub>3</sub>.

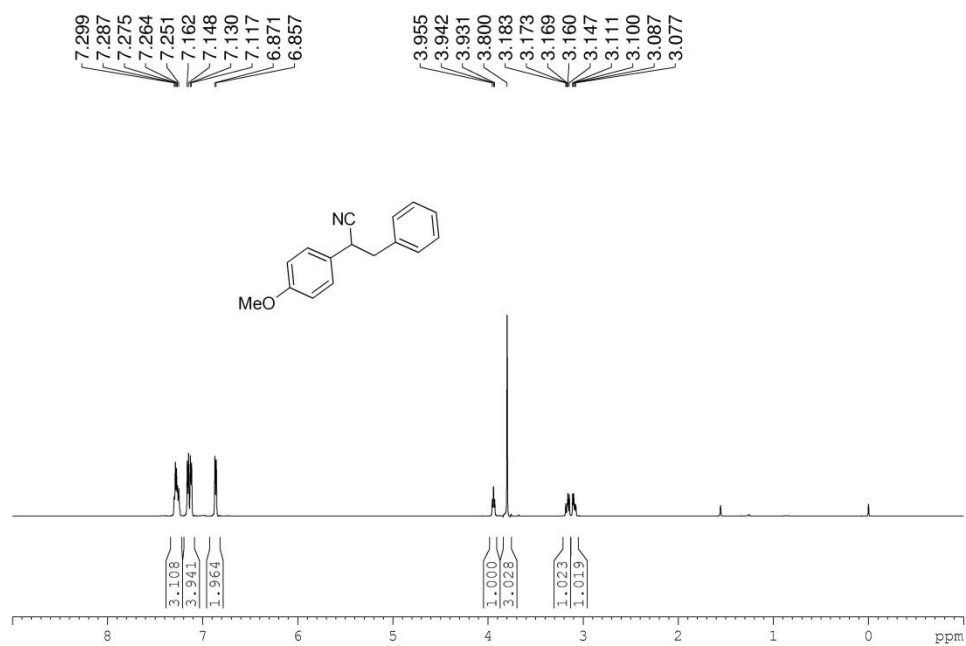

**Figure S56.** <sup>1</sup>H NMR of compound **5b** in CDCl<sub>3</sub>.

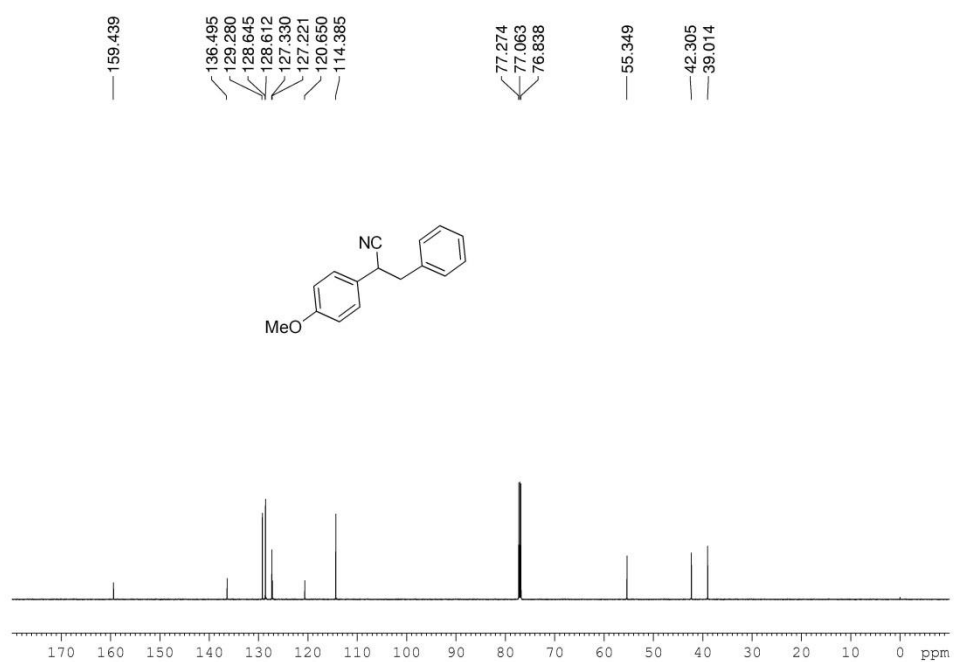

**Figure S57.** <sup>13</sup>C NMR of compound **5b** in CDCl<sub>3</sub>.



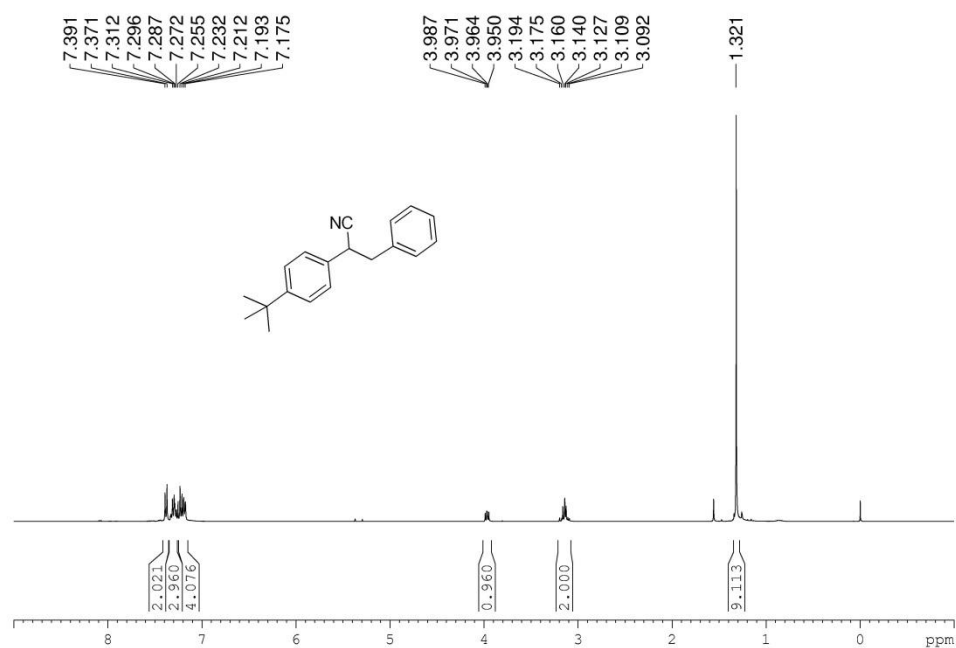

**Figure S58.** <sup>1</sup>H NMR of compound **5c** in CDCl<sub>3</sub>.

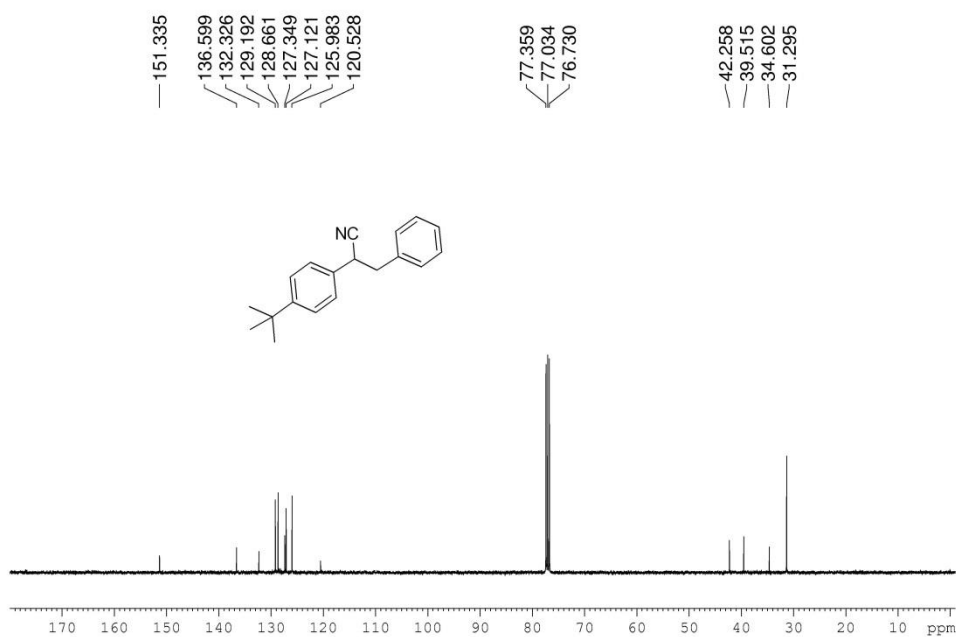

**Figure S59.** <sup>13</sup>C NMR of compound **5c** in CDCl<sub>3</sub>.

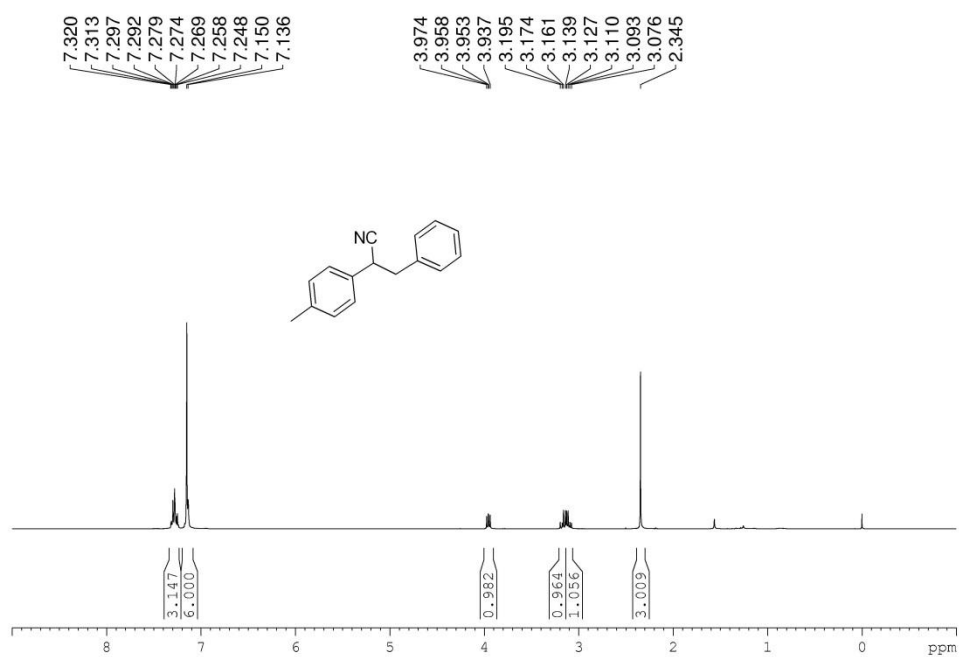

**Figure S60.** <sup>1</sup>H NMR of compound **5d** in CDCl<sub>3</sub>.

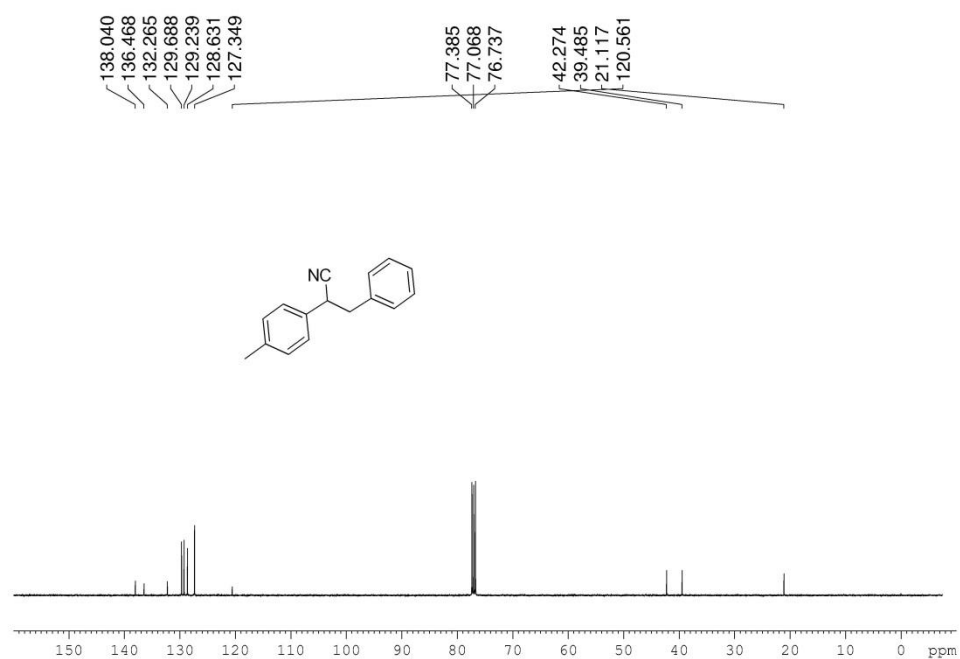

**Figure S61.** <sup>13</sup>C NMR of compound **5d** in CDCl<sub>3</sub>.

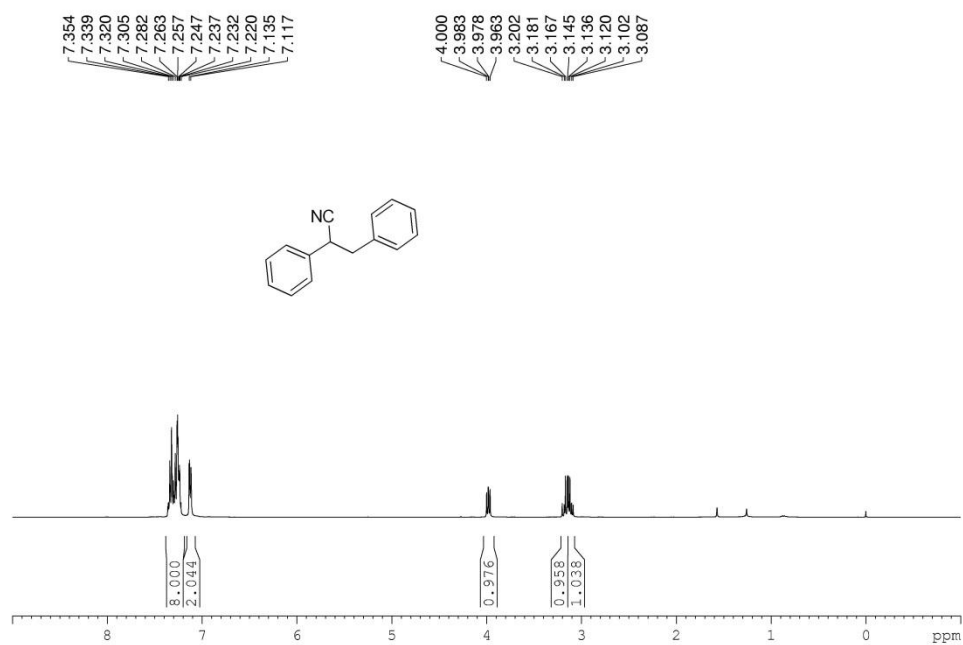

**Figure S62.** <sup>1</sup>H NMR of compound **5e** in CDCl<sub>3</sub>.

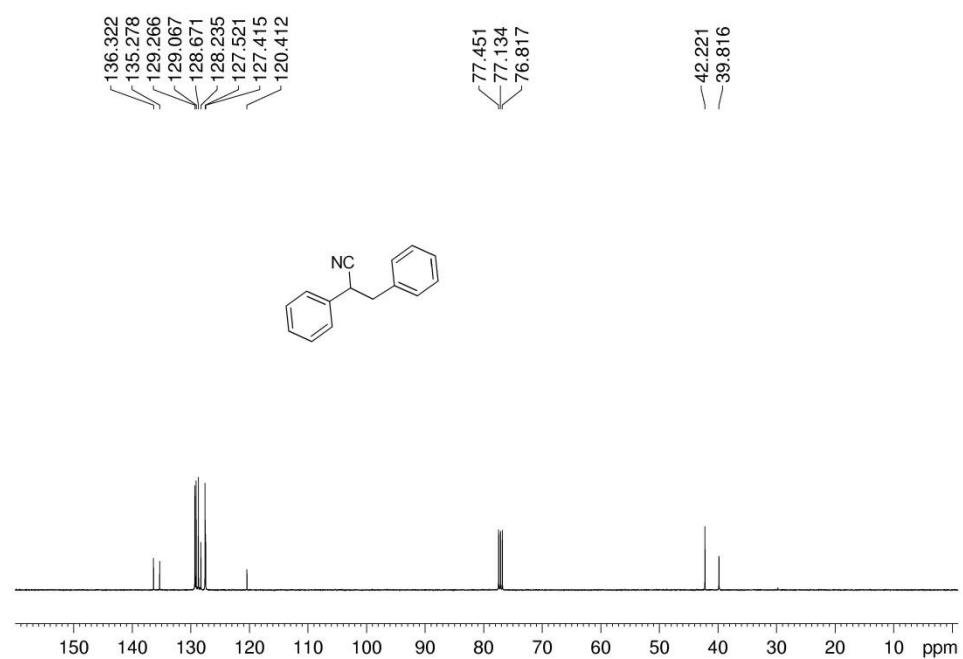

**Figure S63.** <sup>13</sup>C NMR of compound **5e** in CDCl<sub>3</sub>.

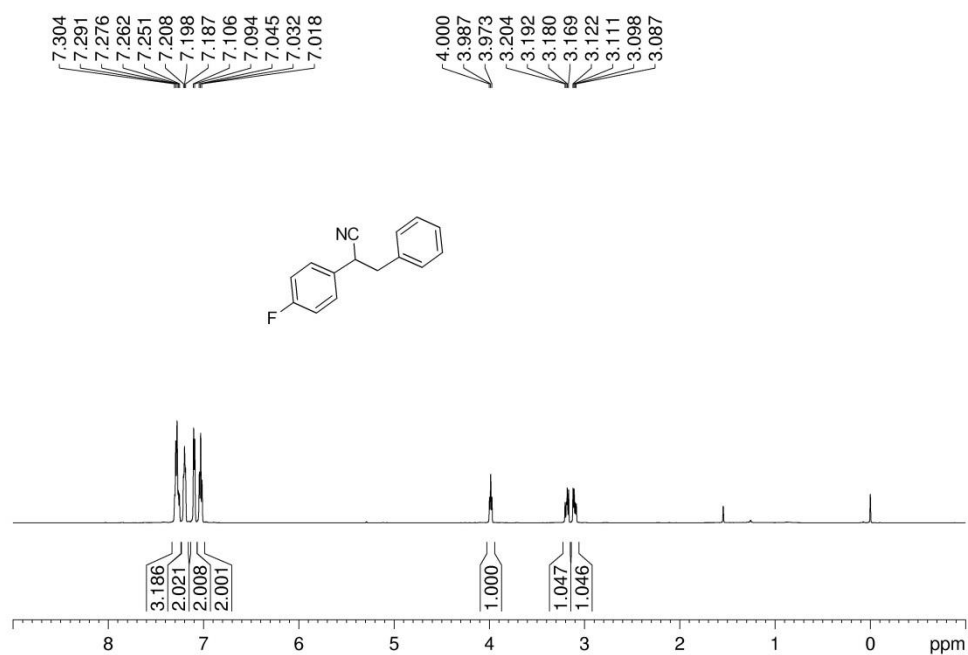

**Figure S64.** <sup>1</sup>H NMR of compound **5f** in CDCl<sub>3</sub>.

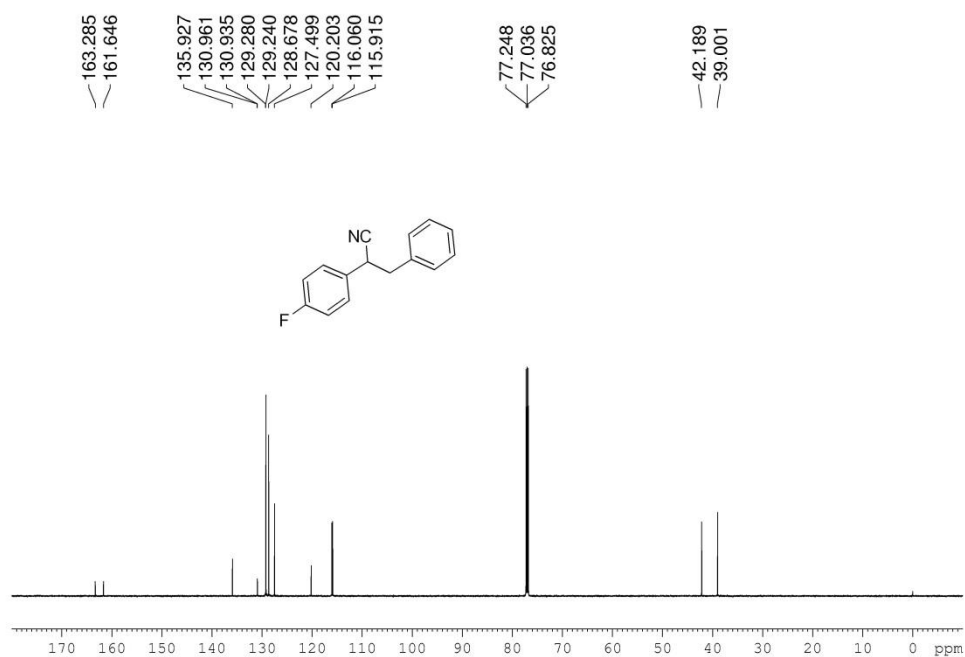

**Figure S65.** <sup>13</sup>C NMR of compound **5f** in CDCl<sub>3</sub>.

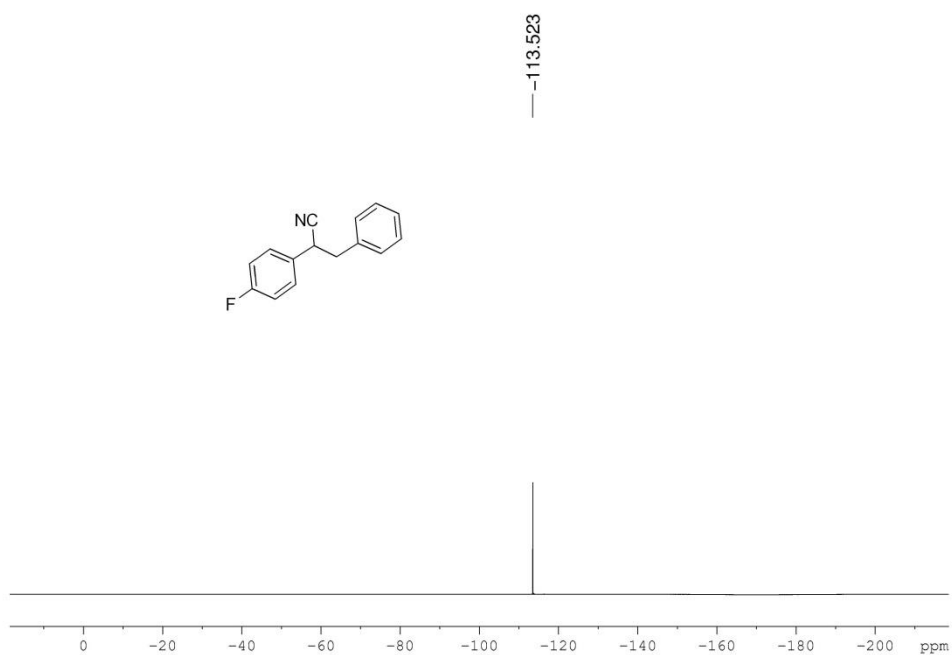

**Figure S66.**  $^{19}\text{F}$  NMR of compound **5f** in CDCl<sub>3</sub>.

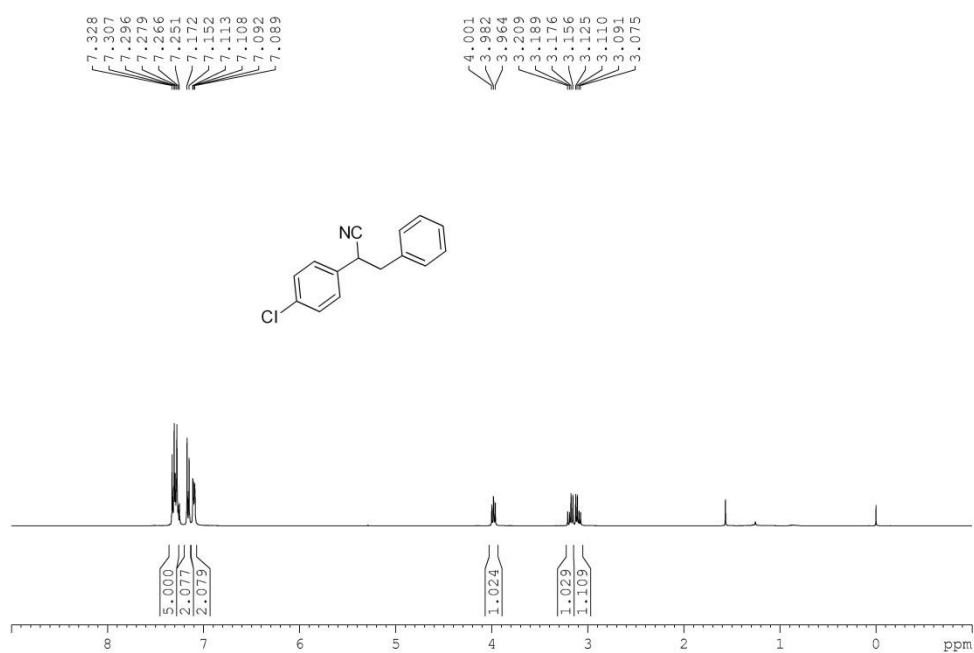

**Figure S67.**  $^1\text{H}$  NMR of compound **5g** in CDCl<sub>3</sub>.

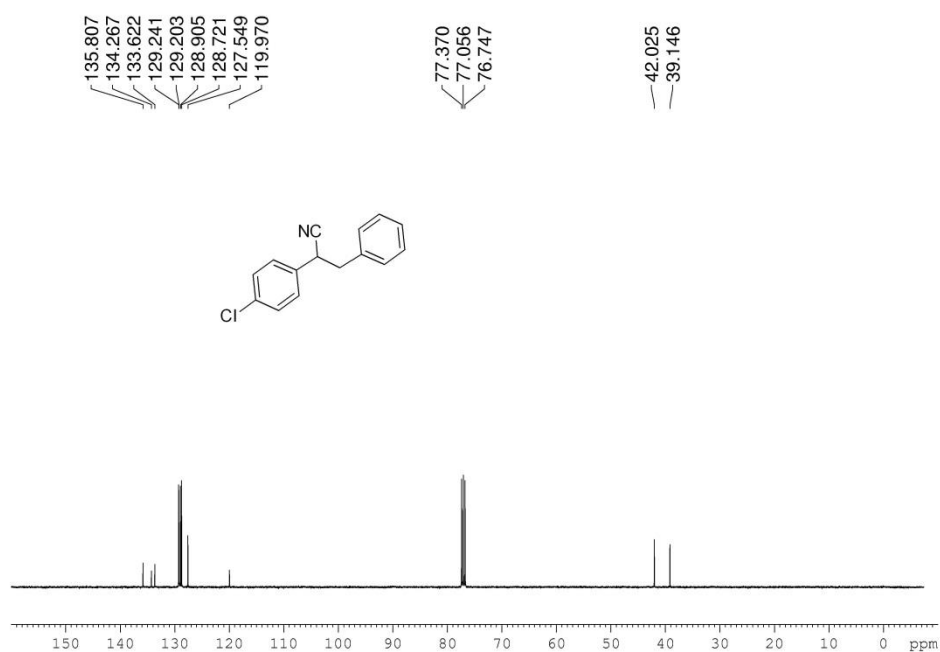

**Figure S68.** <sup>13</sup>C NMR of compound **5g** in CDCl<sub>3</sub>.

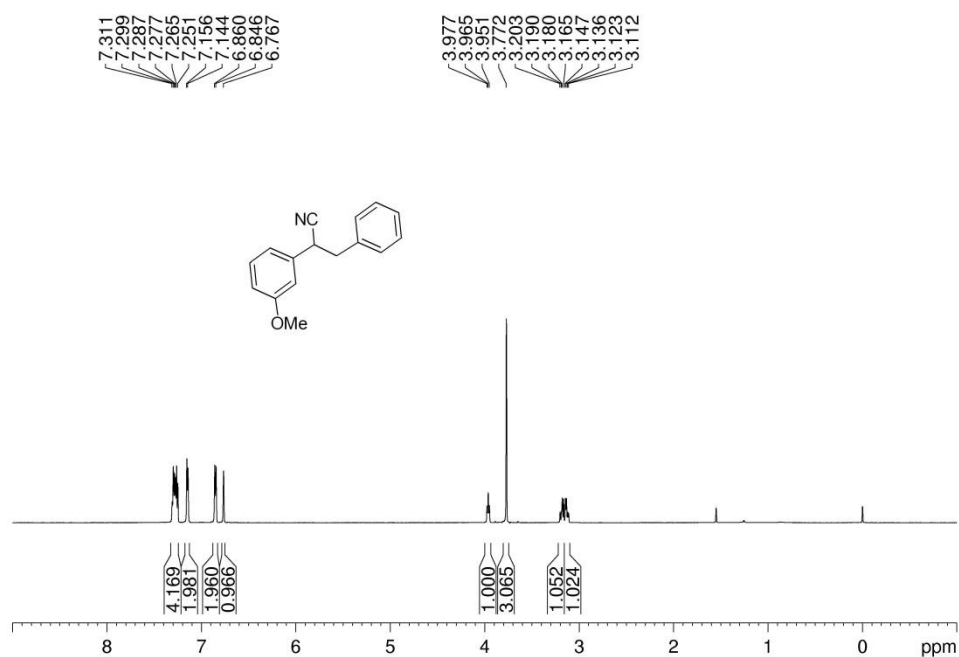

**Figure S69.** <sup>1</sup>H NMR of compound **5h** in CDCl<sub>3</sub>.

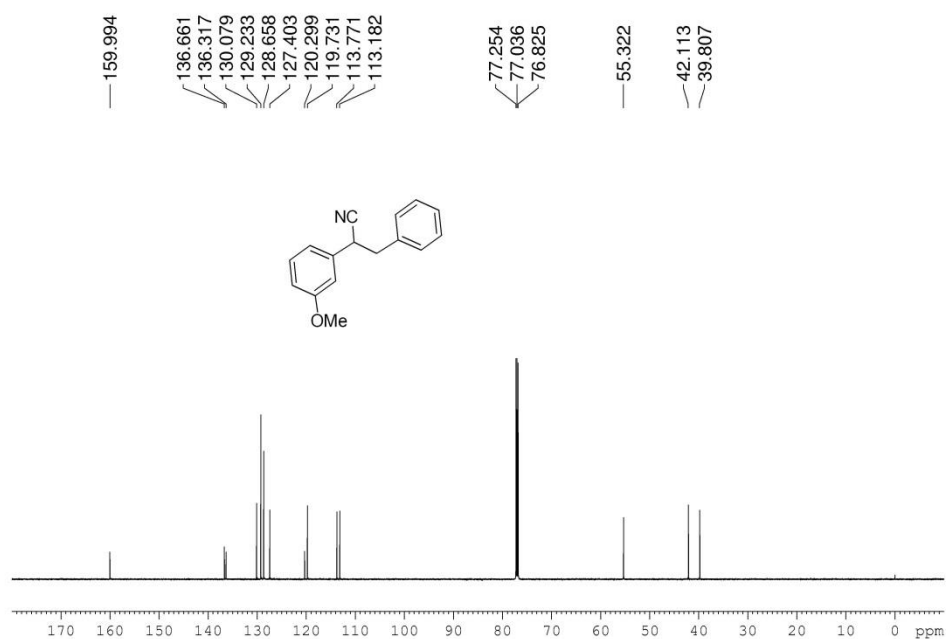

**Figure S70.** <sup>13</sup>C NMR of compound **5h** in CDCl<sub>3</sub>.

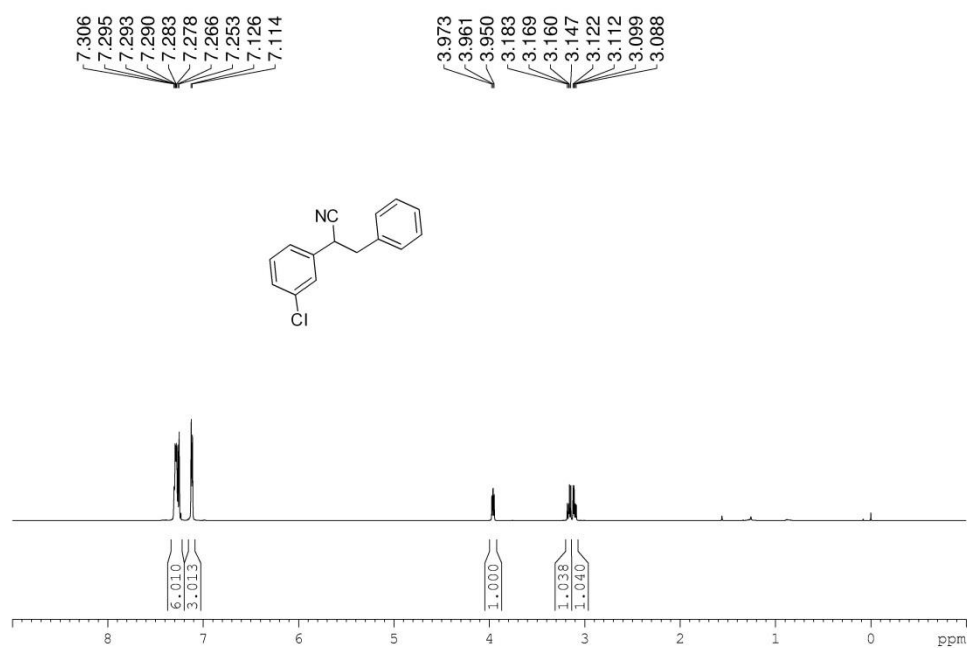

**Figure S71.** <sup>1</sup>H NMR of compound **5i** in CDCl<sub>3</sub>.

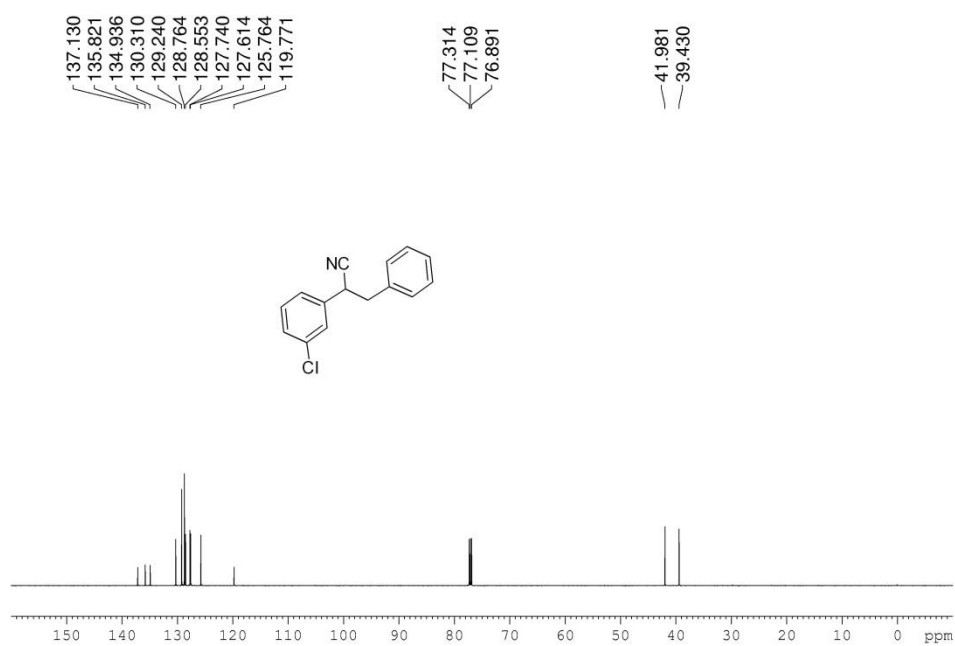

**Figure S72.** <sup>13</sup>C NMR of compound **5i** in CDCl<sub>3</sub>.

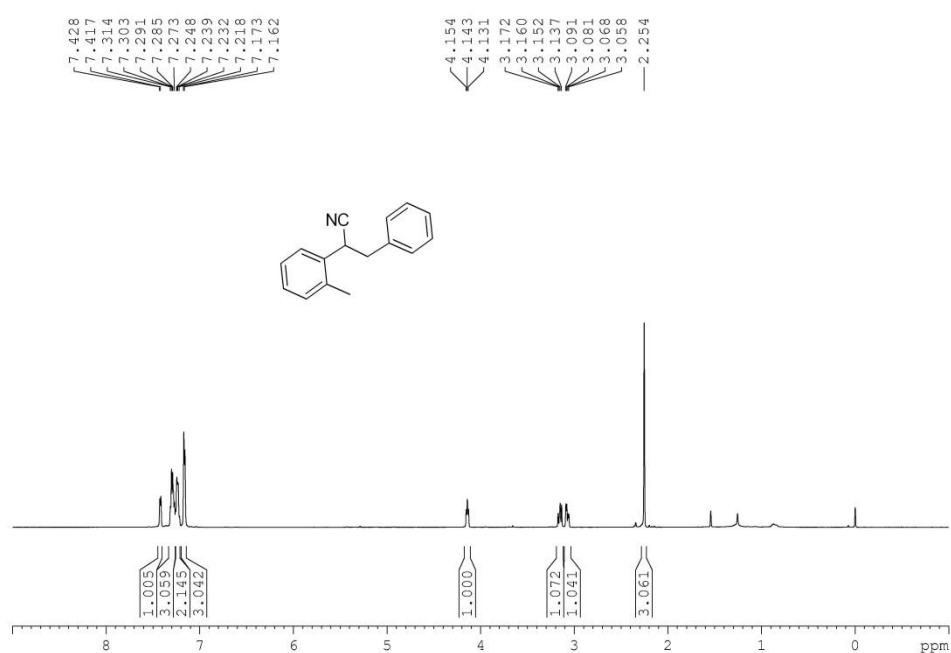

**Figure S73.** <sup>1</sup>H NMR of compound **5j** in CDCl<sub>3</sub>.



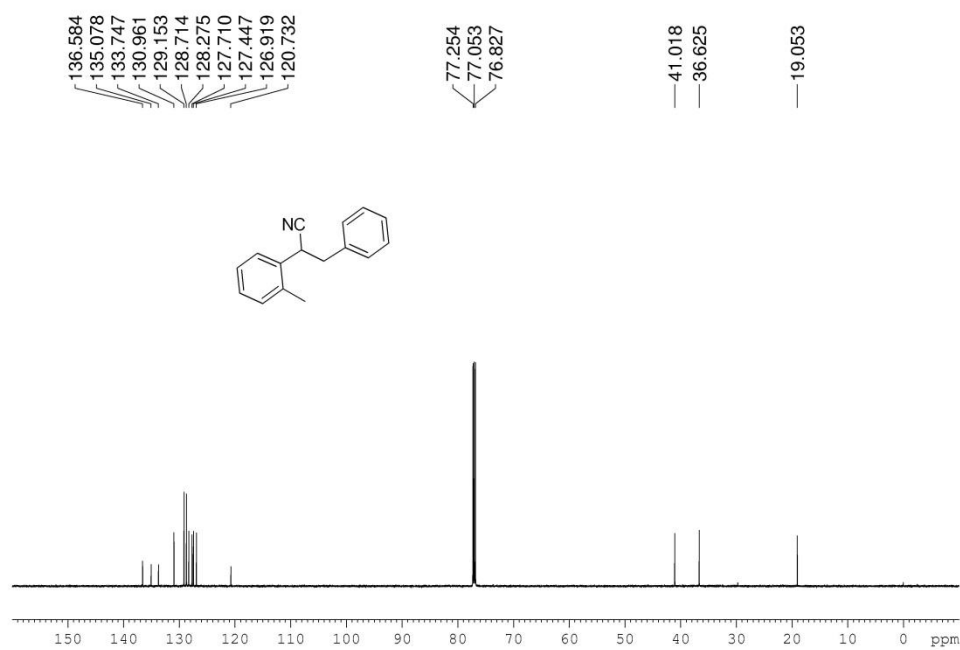

**Figure S74.**  $^{13}\text{C}$  NMR of compound **5j** in  $\text{CDCl}_3$ .

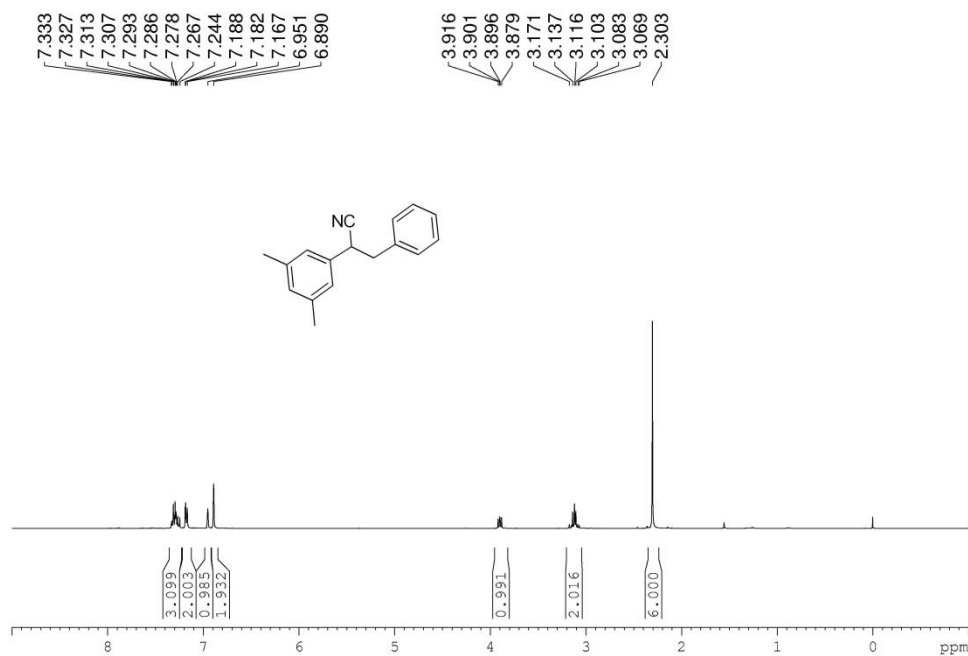

**Figure S75.**  $^1\text{H}$  NMR of compound **5k** in  $\text{CDCl}_3$ .

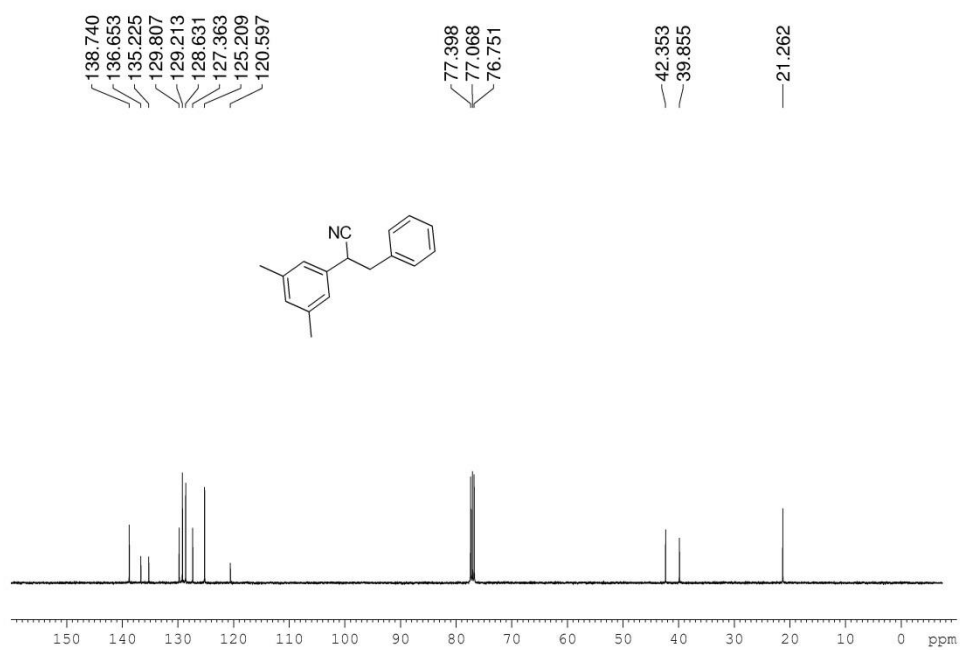

**Figure S76.** <sup>13</sup>C NMR of compound **5k** in CDCl<sub>3</sub>.

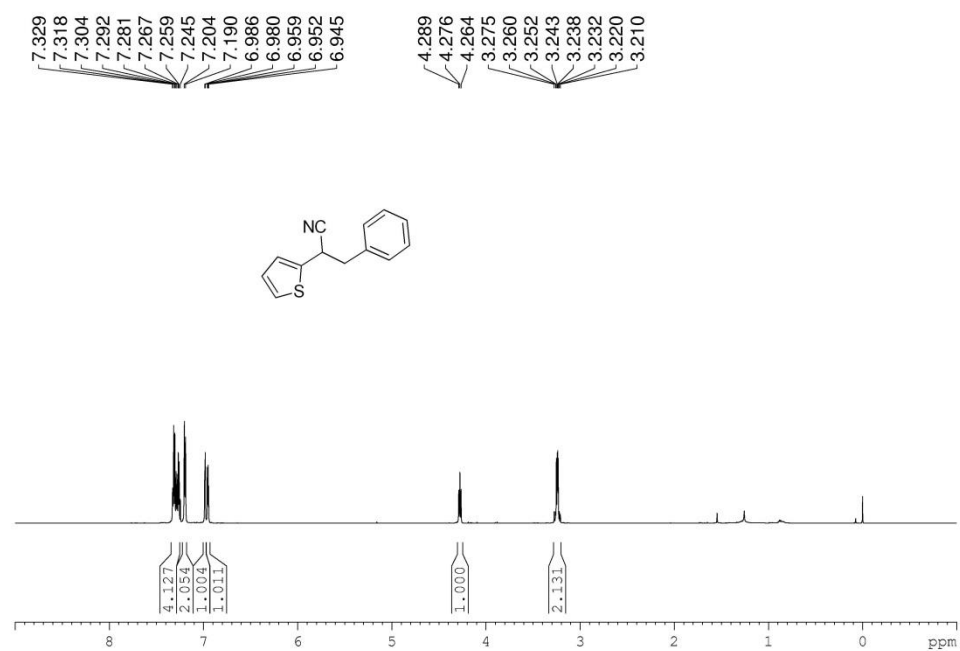

**Figure S77.** <sup>1</sup>H NMR of compound **5l** in CDCl<sub>3</sub>.

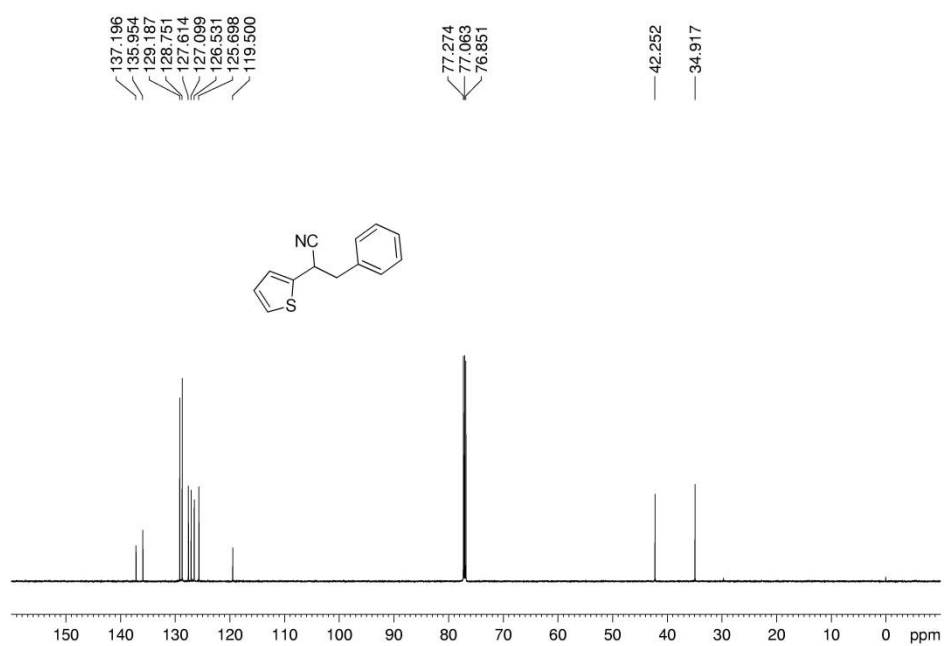

**Figure S78.** <sup>13</sup>C NMR of compound **5l** in CDCl<sub>3</sub>.

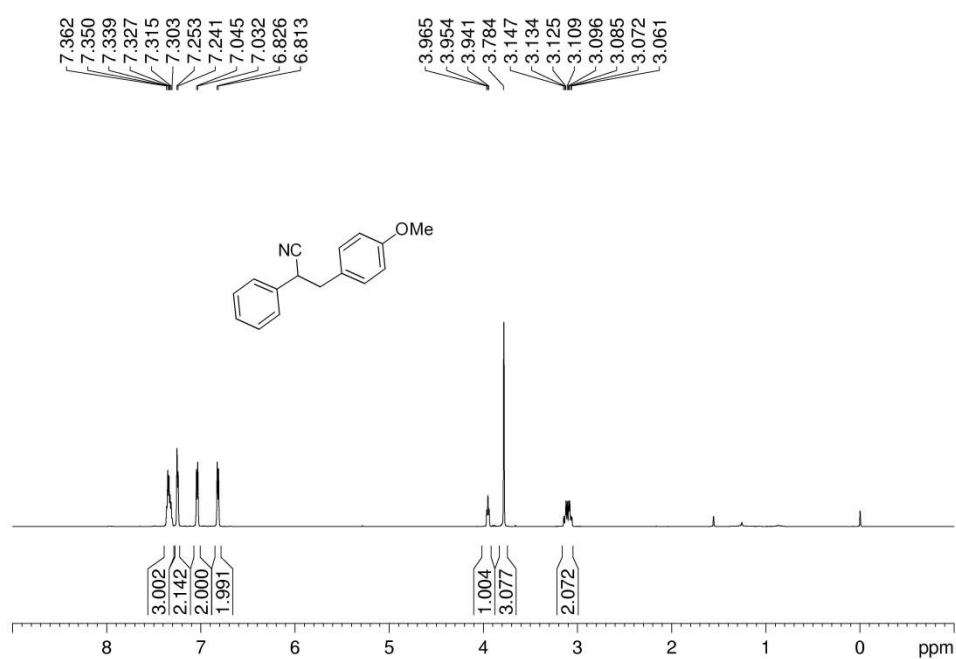

**Figure S79.** <sup>1</sup>H NMR of compound **5m** in CDCl<sub>3</sub>.

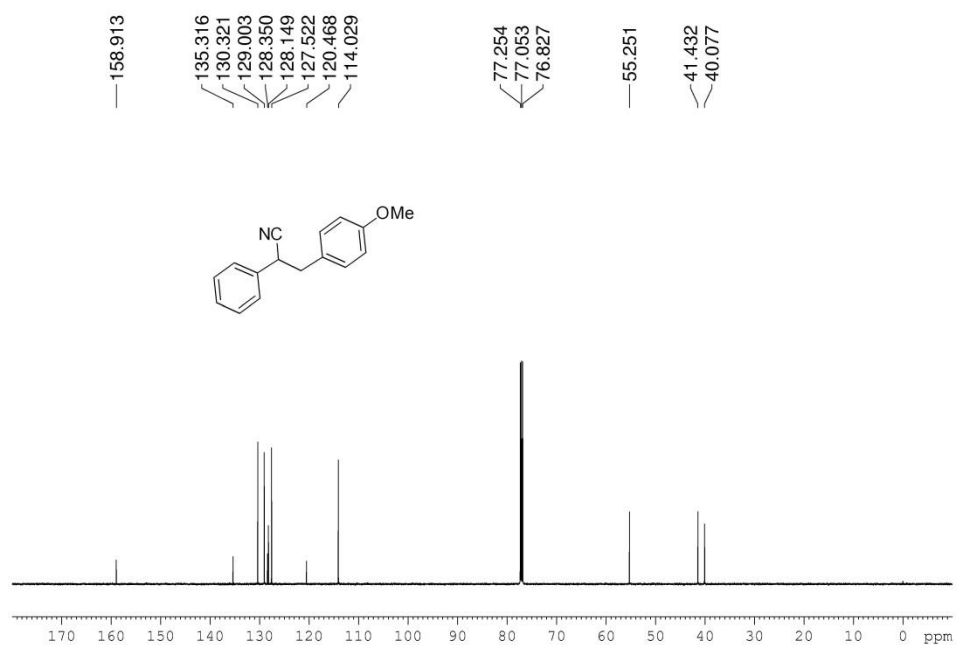

**Figure S80.** <sup>13</sup>C NMR of compound **5m** in CDCl<sub>3</sub>.

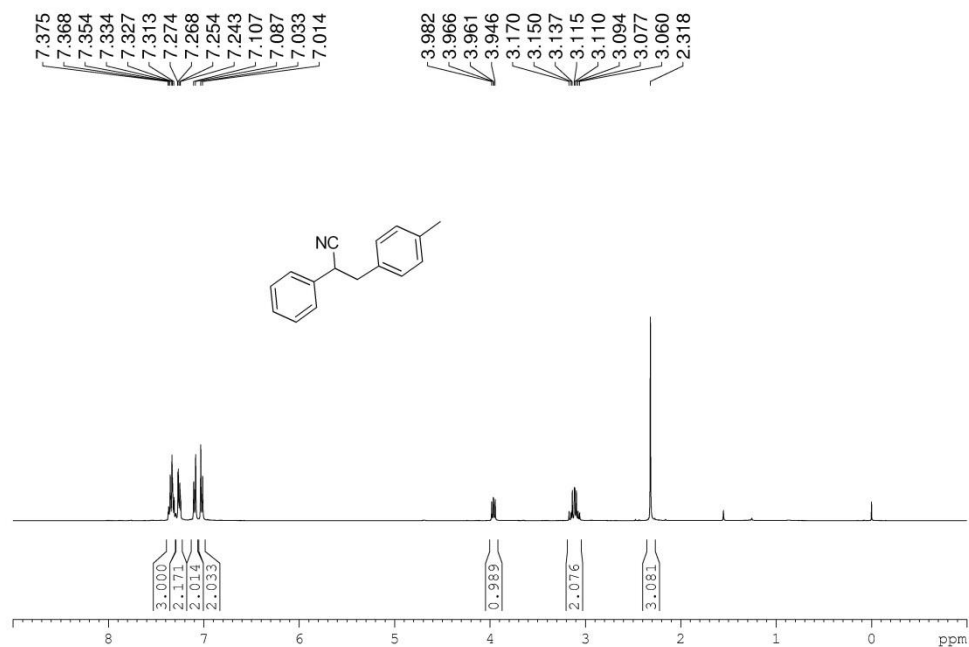

**Figure S81.** <sup>1</sup>H NMR of compound **5n** in CDCl<sub>3</sub>.

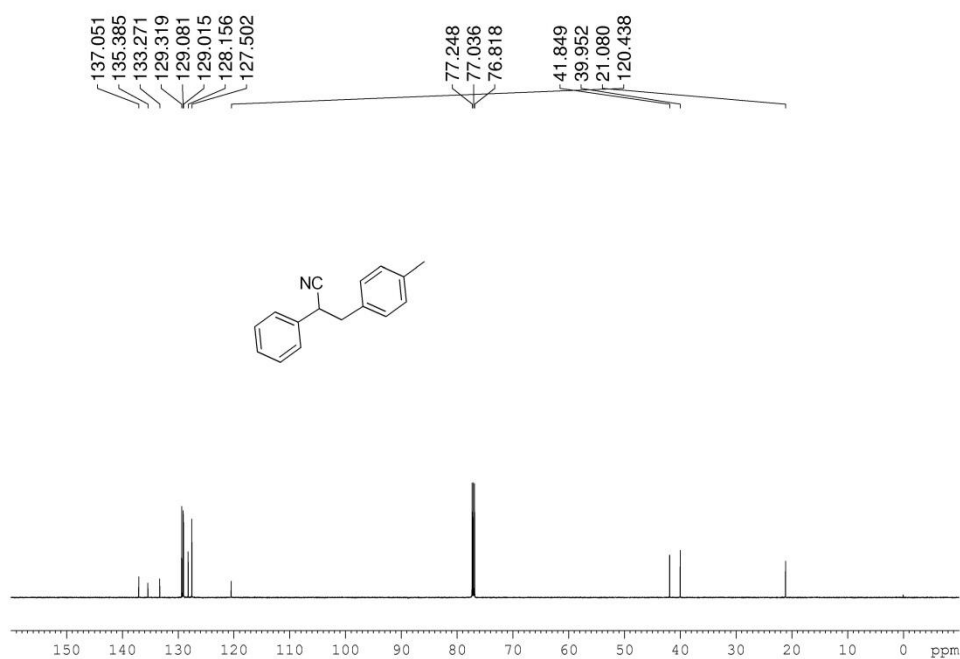

**Figure S82.** <sup>13</sup>C NMR of compound **5n** in CDCl<sub>3</sub>.

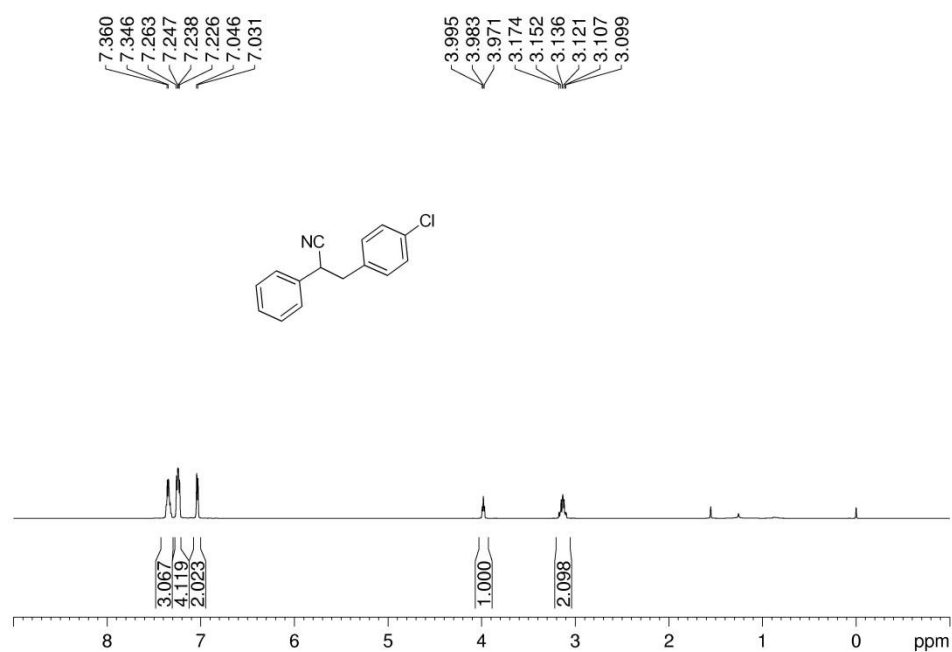

**Figure S83.** <sup>1</sup>H NMR of compound **5o** in CDCl<sub>3</sub>.

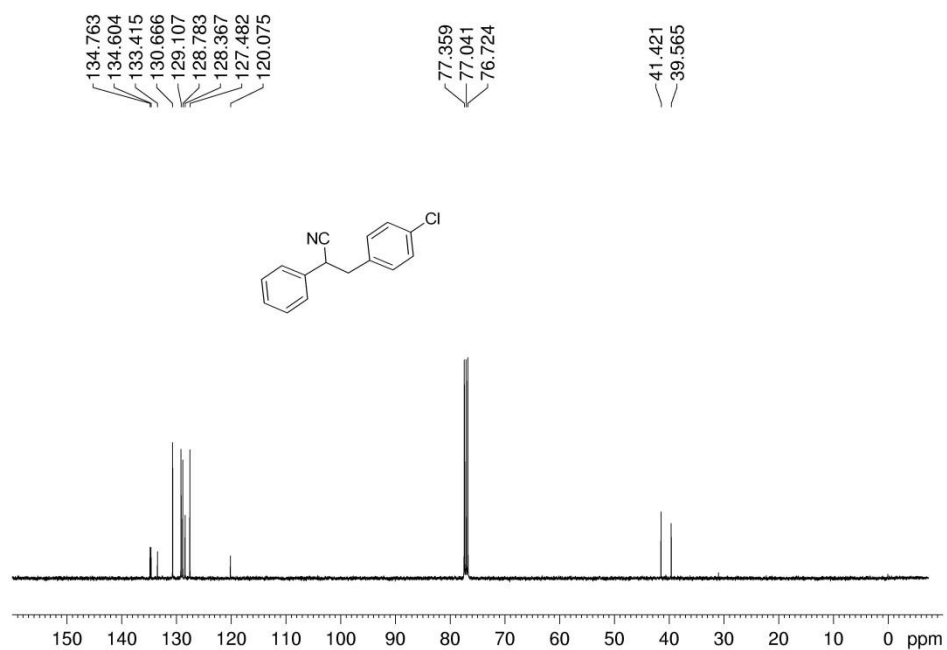

**Figure S84.** <sup>13</sup>C NMR of compound **5o** in CDCl<sub>3</sub>.

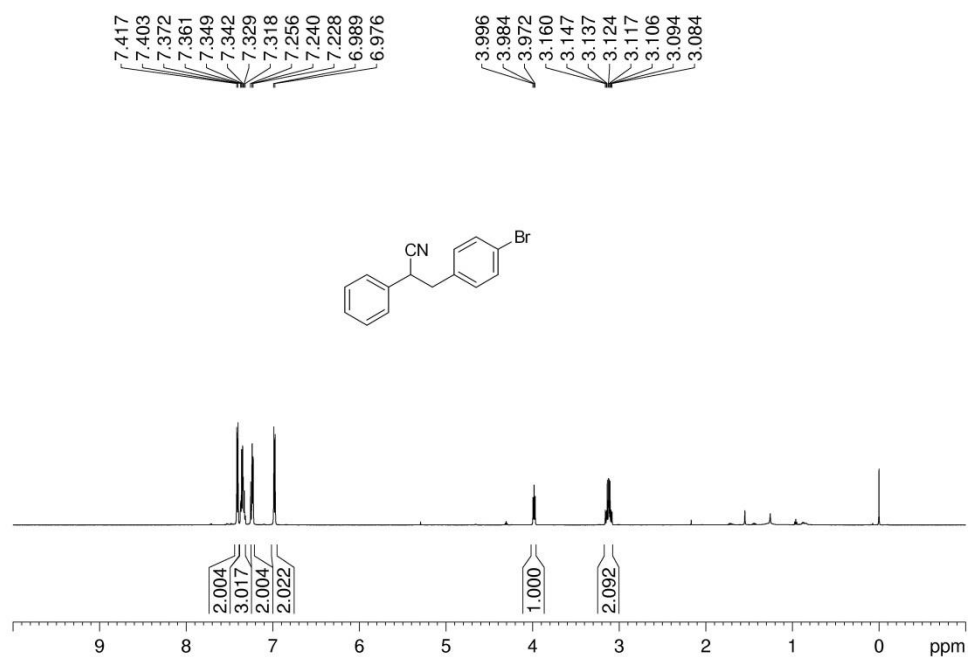

**Figure S85.** <sup>1</sup>H NMR of compound **5p** in CDCl<sub>3</sub>.

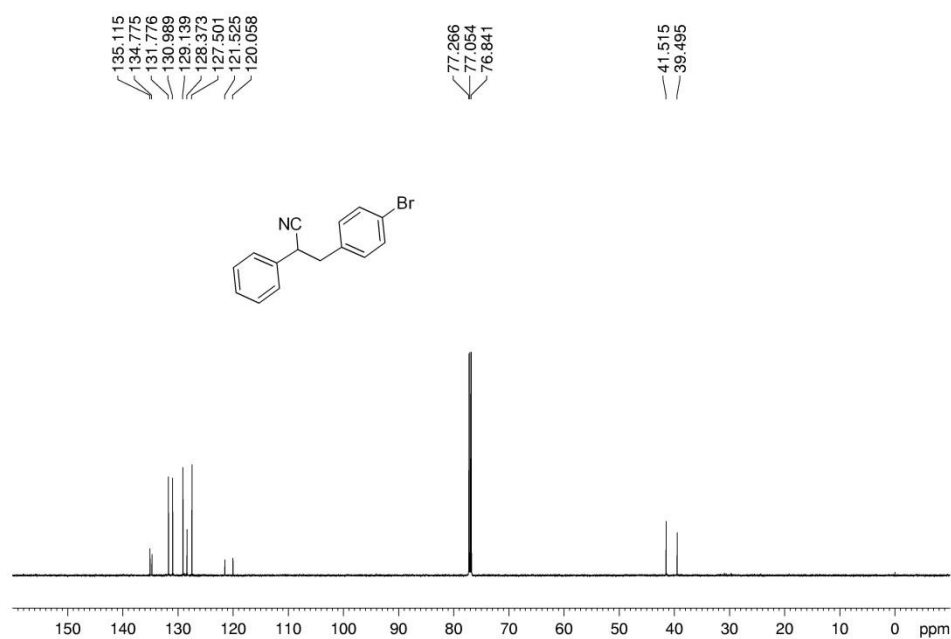

**Figure S86.** <sup>13</sup>C NMR of compound **5p** in CDCl<sub>3</sub>.

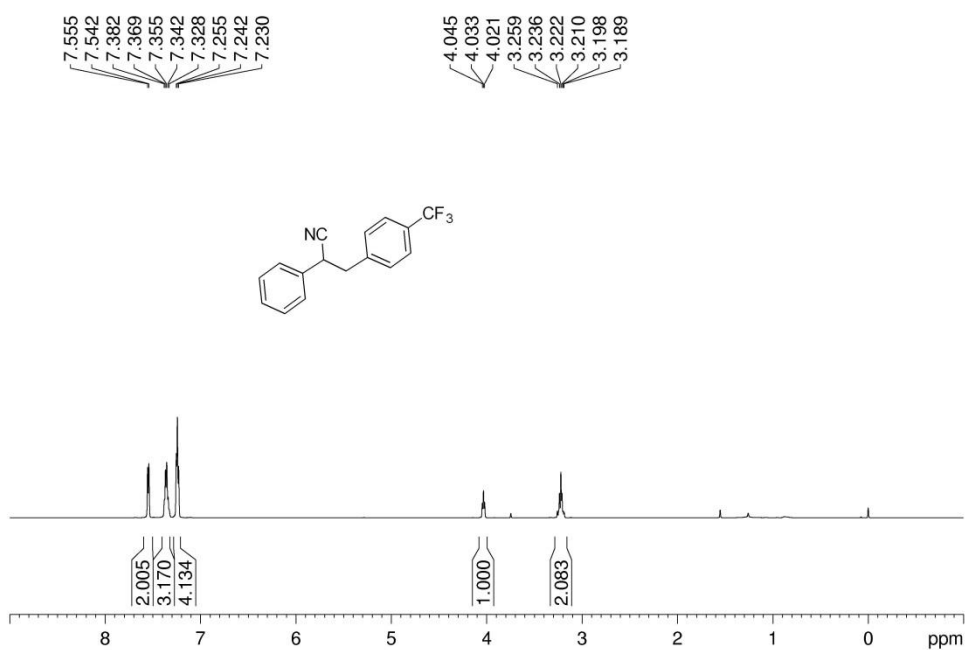

**Figure S87.** <sup>1</sup>H NMR of compound **5q** in CDCl<sub>3</sub>.

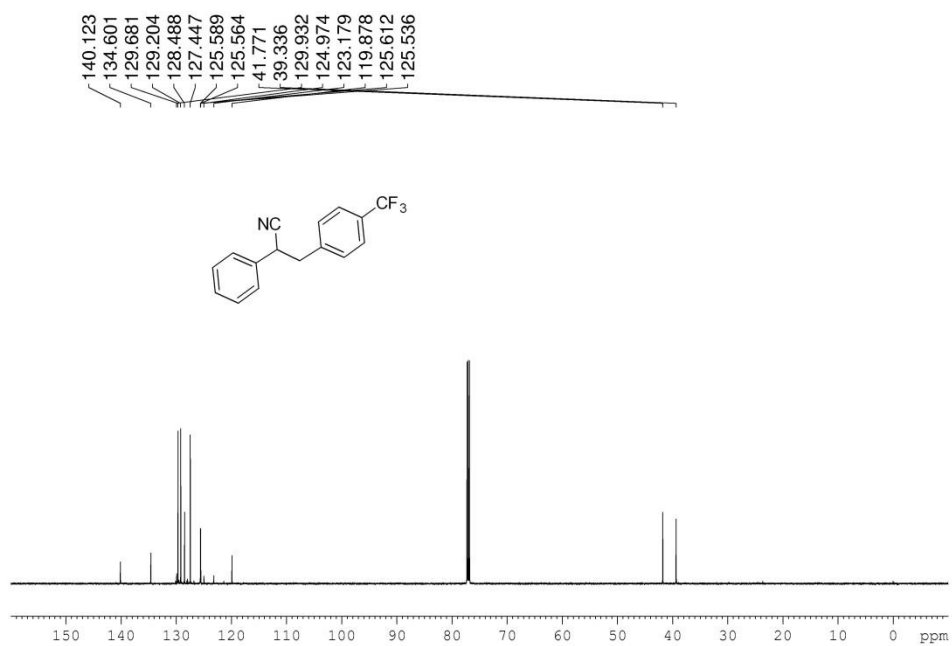

**Figure S88.** <sup>13</sup>C NMR of compound **5q** in CDCl<sub>3</sub>.

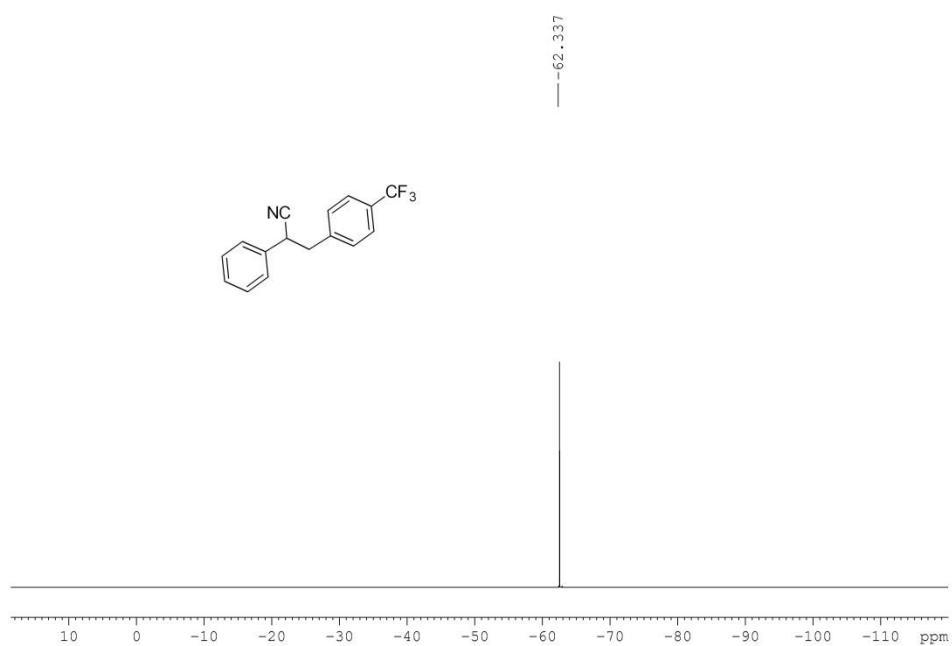

**Figure S89.** <sup>19</sup>F NMR of compound **5q** in CDCl<sub>3</sub>.



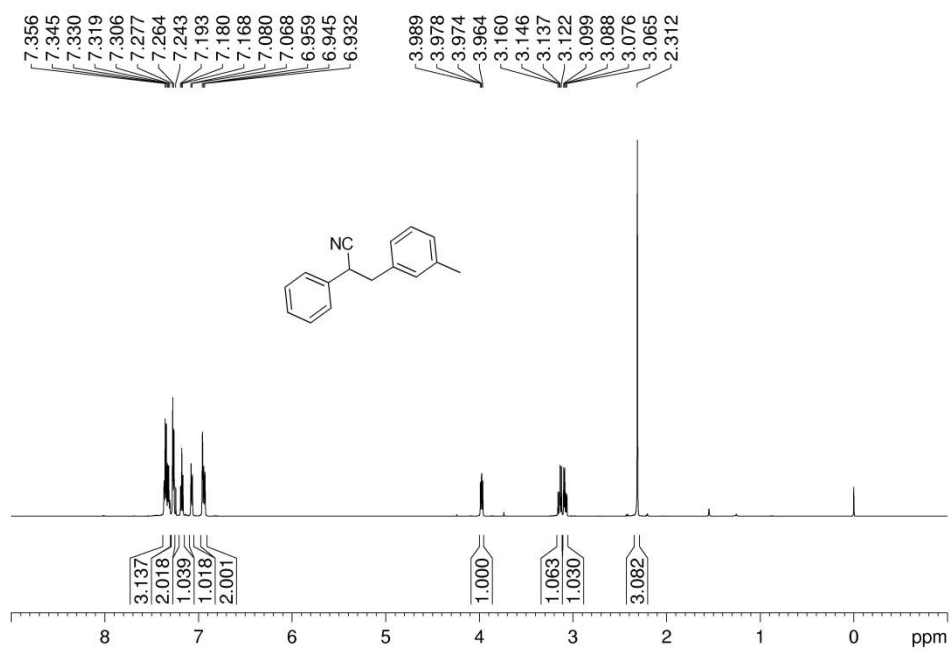

**Figure S90.** <sup>1</sup>H NMR of compound **5r** in CDCl<sub>3</sub>.

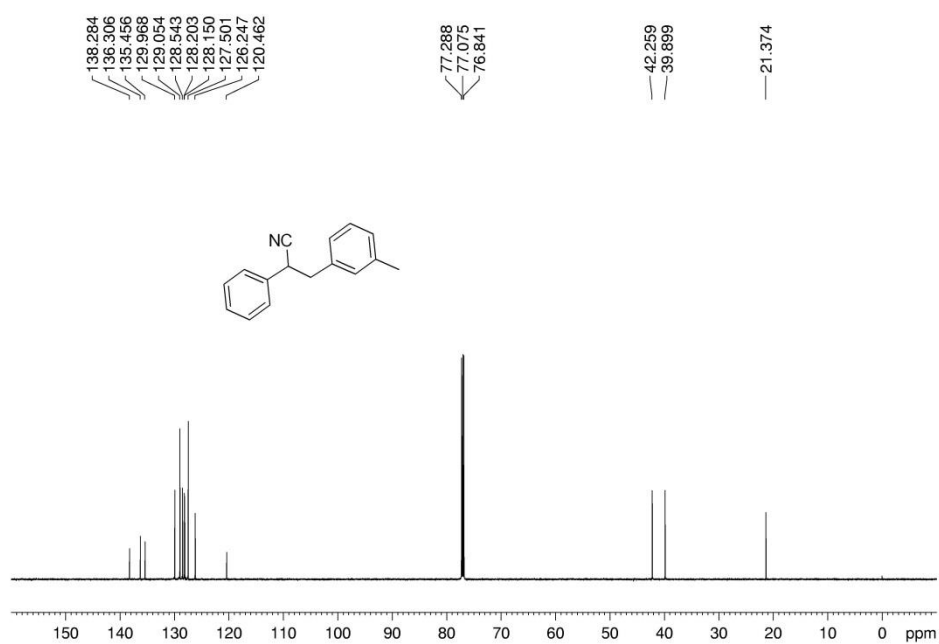

**Figure S91.** <sup>13</sup>C NMR of compound **5r** in CDCl<sub>3</sub>.

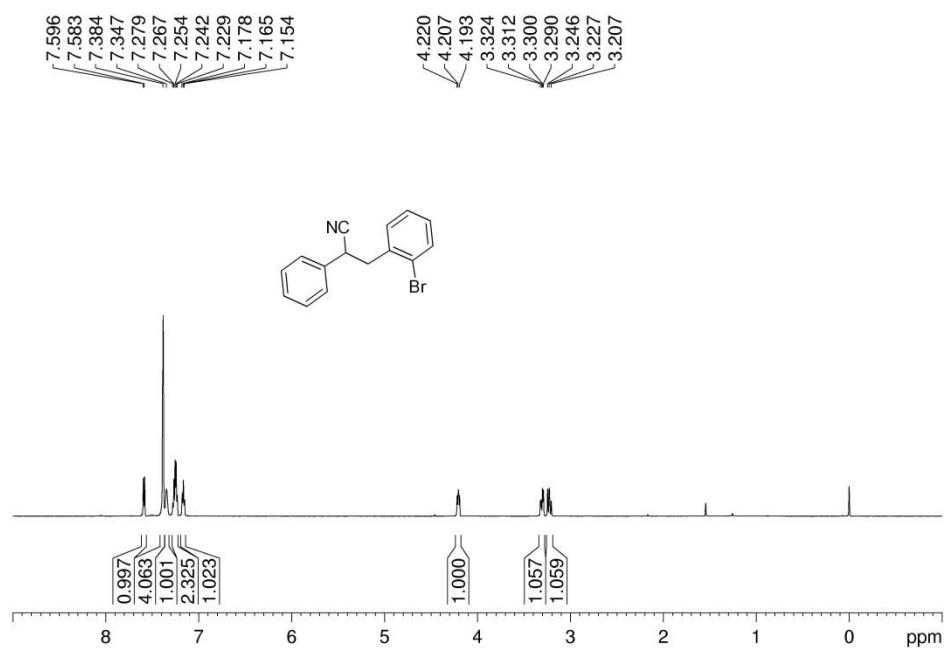

**Figure S92.** <sup>1</sup>H NMR of compound **5s** in CDCl<sub>3</sub>.

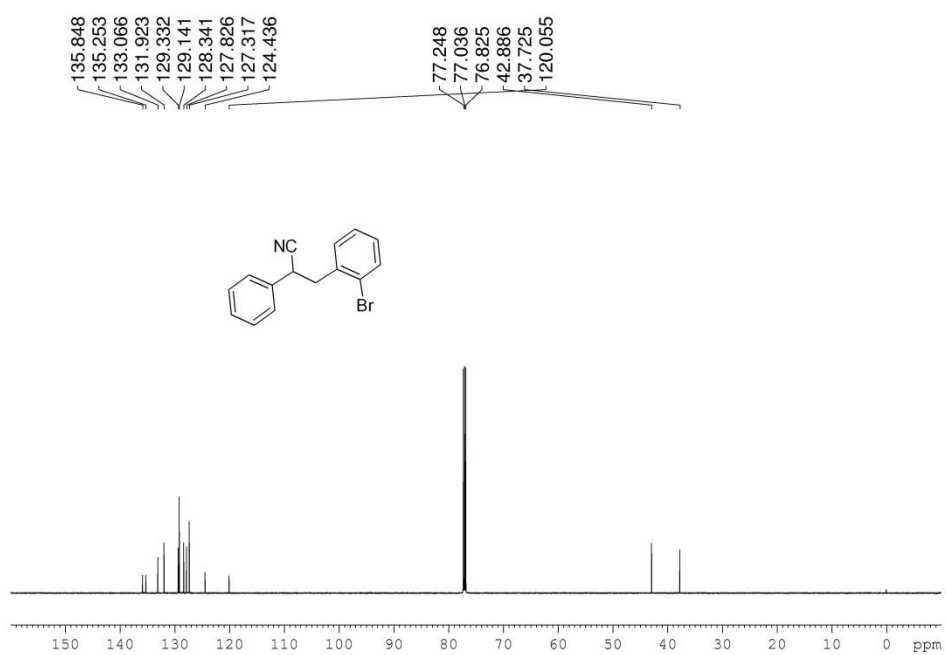

**Figure S93.** <sup>13</sup>C NMR of compound **5s** in CDCl<sub>3</sub>.

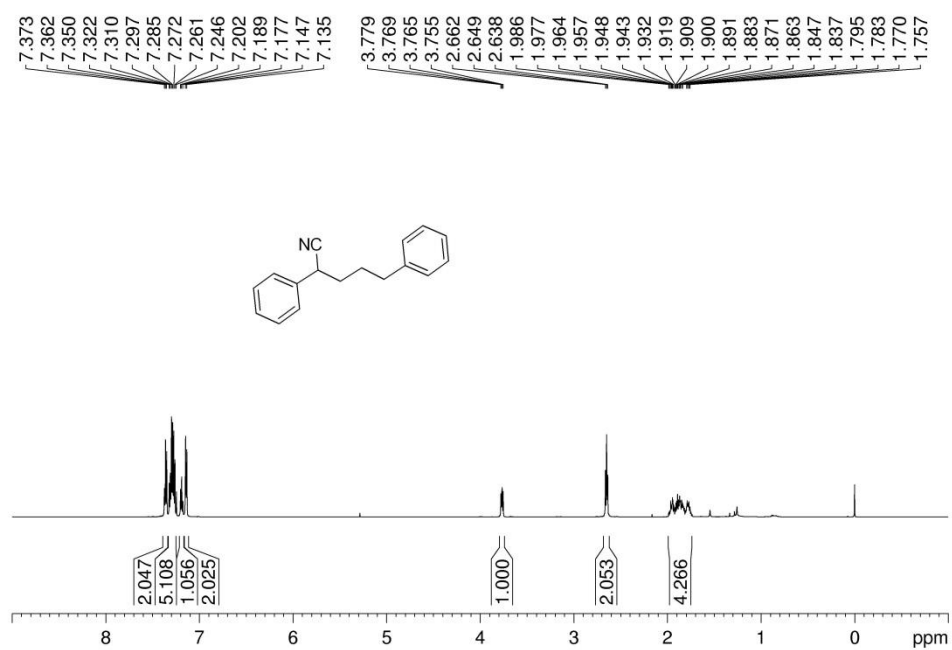

**Figure S94.** <sup>1</sup>H NMR of compound **5t** in CDCl<sub>3</sub>.

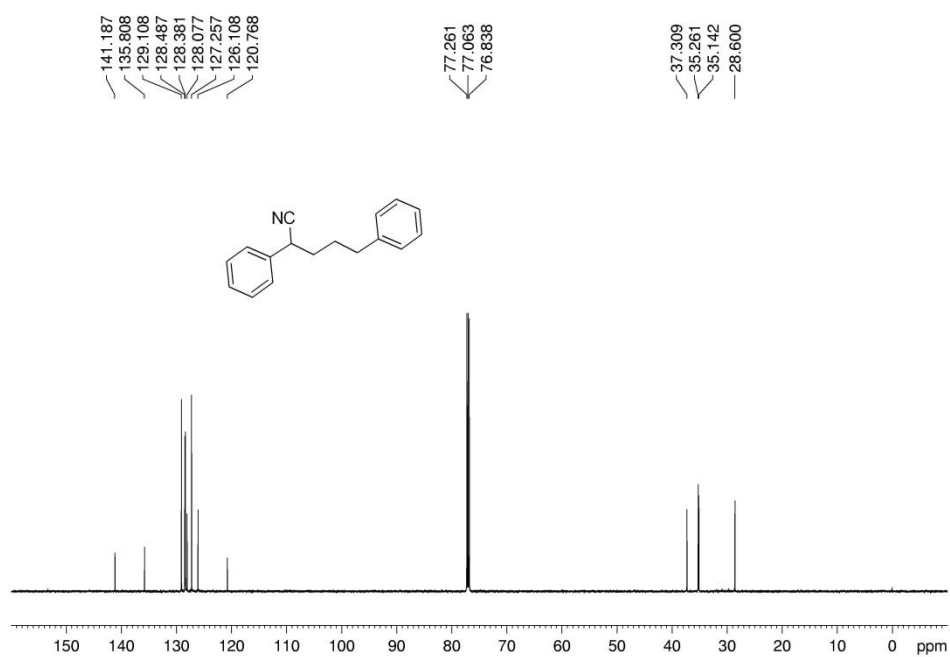

**Figure S95.** <sup>13</sup>C NMR of compound **5t** in CDCl<sub>3</sub>.

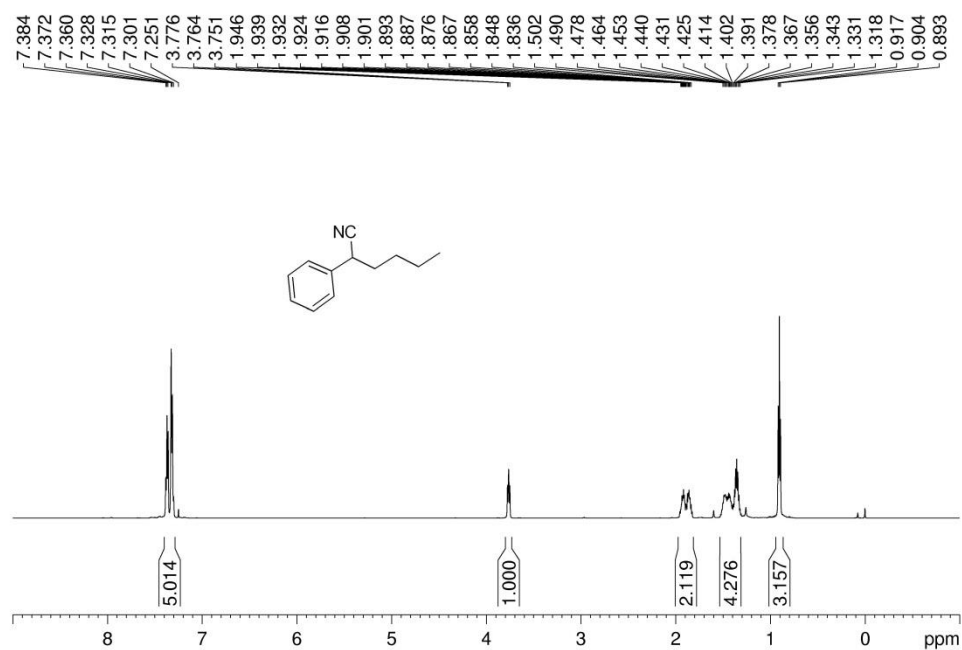

**Figure S96.** <sup>1</sup>H NMR of compound **5u** in CDCl<sub>3</sub>.

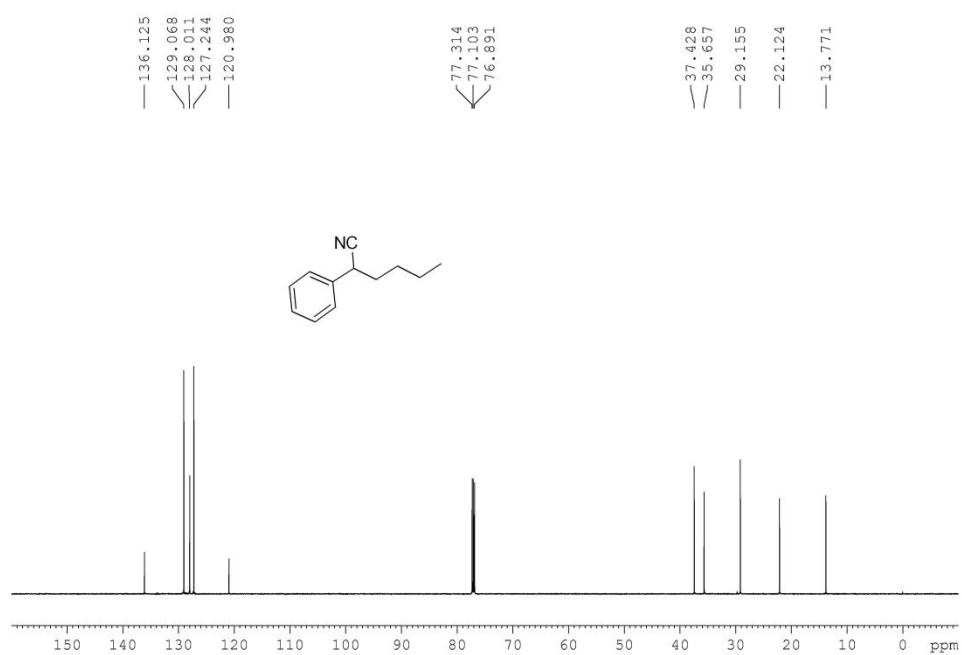

**Figure S97.** <sup>13</sup>C NMR of compound **5u** in CDCl<sub>3</sub>.

## IR of compound 2a-h

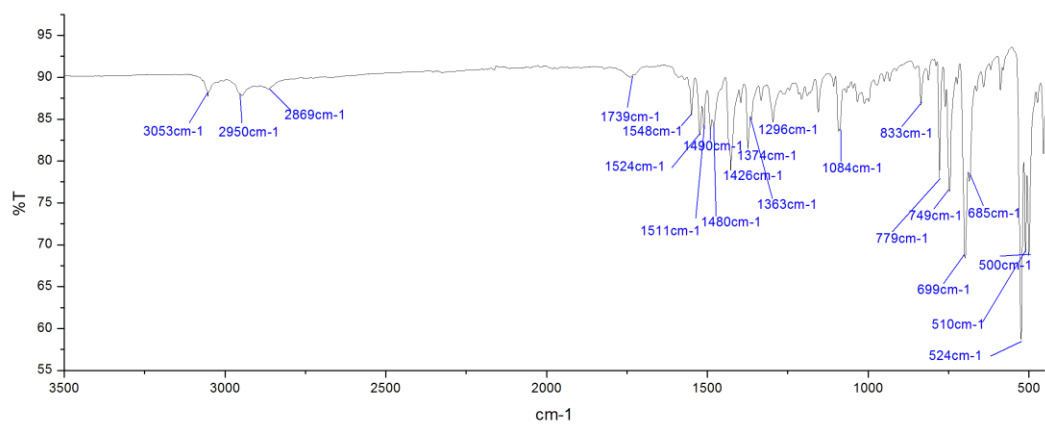

Figure S98. IR of compound 2a.

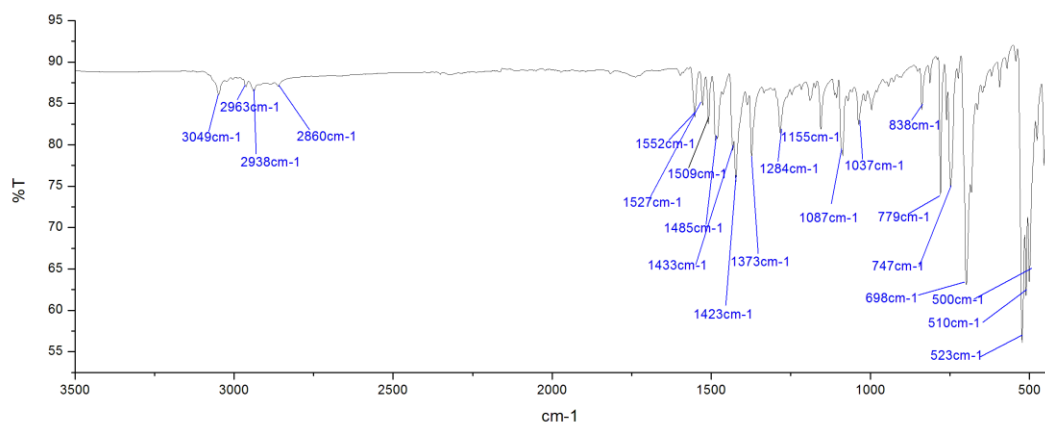

Figure S99. IR of compound 2b.

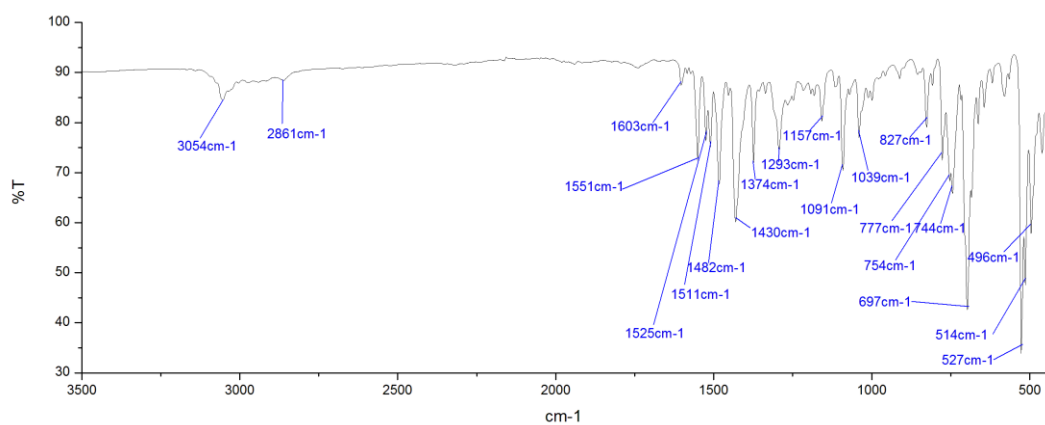

Figure S100. IR of compound 2c.

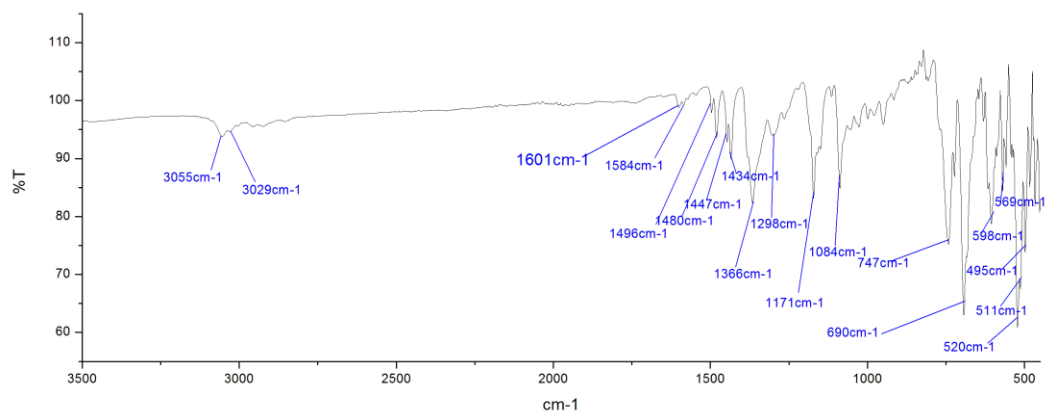

**Figure S101.** IR of compound **2d**.

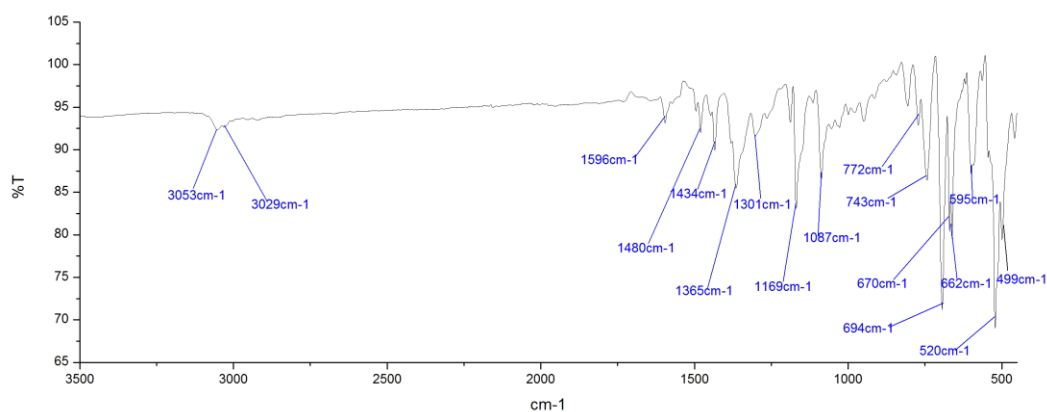

**Figure S102.** IR of compound **2e**.

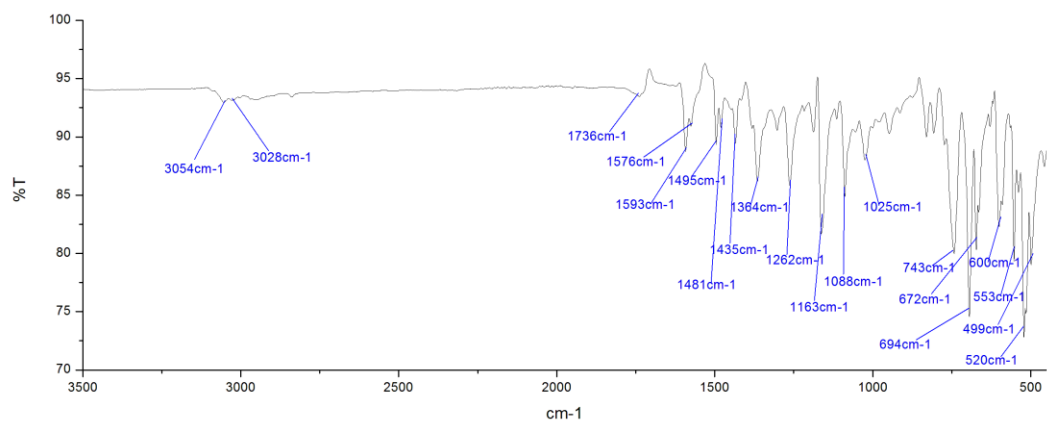

**Figure S103.** IR of compound **2f**.

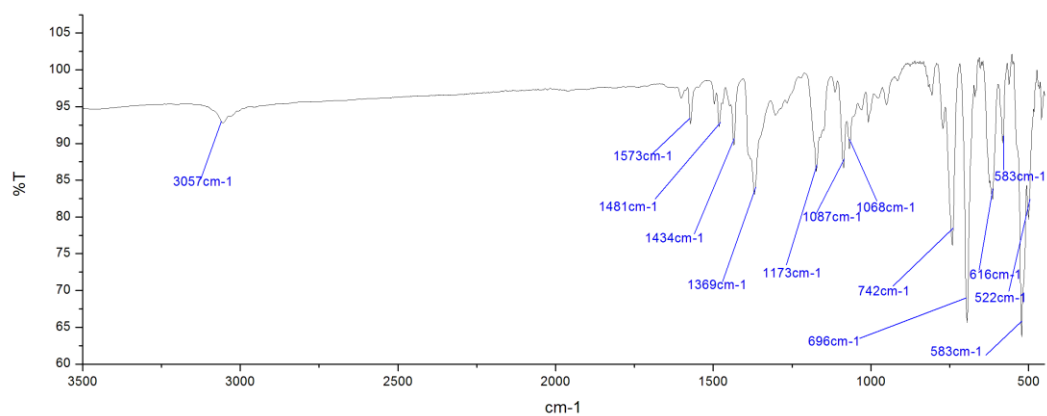

**Figure S104.** IR of compound **2g**.

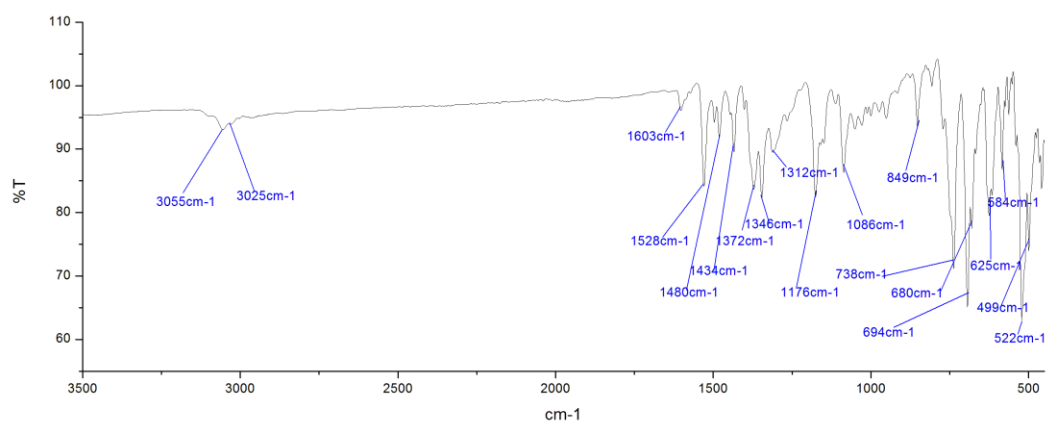

**Figure S105.** IR of compound **2h**.
